# Supplementary material for: Reversible fluorescence and Förster resonance energy transfer switching behaviours of bistable photo-switchable [c2] daisy chain rotaxanes and photo-patterning applications
Source: Royal Society of Chemistry journal article supplement (doi:10.1039/d2tc03814e), 2022-01-01
Supplement: d2tc03814e1.pdf [file d2tc03814e1.pdf]

## Supplementary Information

### Reversible fluorescence and Förster resonance energy transfer switching behaviours of bistable photo-switchable [c2] daisy chain rotaxanes and photo-patterning applications

Pham Quoc Nhien,<sup>a,b</sup> Jia-Huei Tien,<sup>a</sup> Tu Thi Kim Cuc,<sup>a</sup> Trang Manh Khang,<sup>a</sup> Nguyen Thanh Trung,<sup>a</sup> Chia-Hua Wu,<sup>a</sup> Bui Thi Buu Hue,<sup>b</sup> Judy I. Wu<sup>c</sup> and Hong-Cheu Lin<sup>\*,a,c,d</sup>

<sup>a</sup>Department of Materials Science and Engineering, National Yang Ming Chiao Tung University, Hsinchu 300, Taiwan.

<sup>b</sup>Department of Chemistry, College of Natural Sciences, Can Tho University, Can Tho City, 94000, Viet Nam.

<sup>c</sup>Department of Chemistry, University of Houston, Houston, Texas 77204, United States.

<sup>d</sup>Center for Emergent Functional Matter Science, National Yang Ming Chiao Tung University, Hsinchu 300, Taiwan.

Email: [linhc@nycu.edu.tw](mailto:linhc@nycu.edu.tw) Tel: +886-3-5712121-55305

#### Table of contents

|                                                                                                      |     |
|------------------------------------------------------------------------------------------------------|-----|
| 1. Synthetic procedures.....                                                                         | S1  |
| 2. Characterizations of intermediate compounds and photo-switchable [c2] daisy chain rotaxanes ..... | S8  |
| 3. Photo-physical studies of novel compounds.....                                                    | S27 |
| 4. References.....                                                                                   | S31 |

## 1. Synthetic procedures

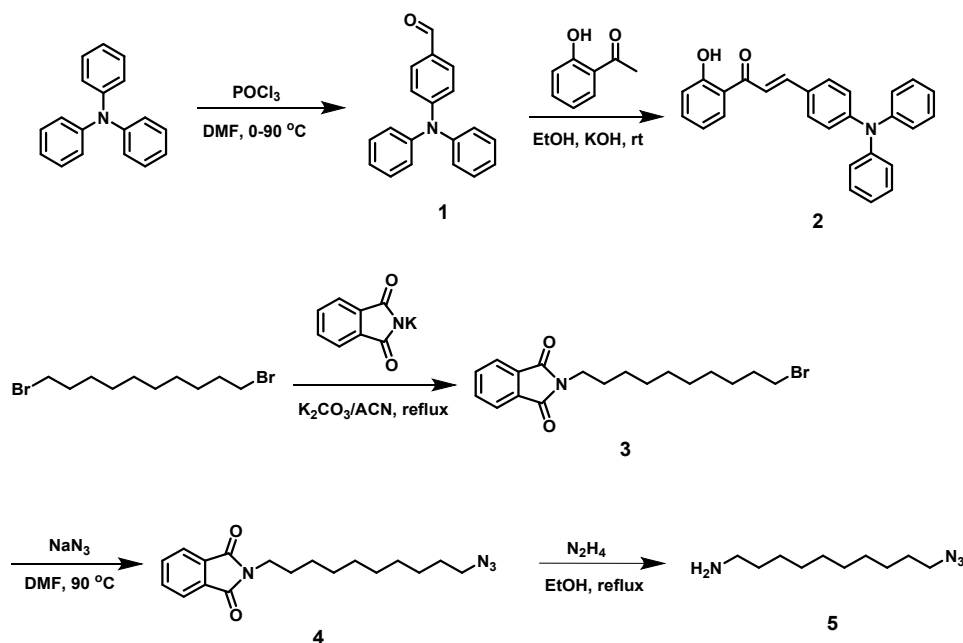

**Scheme S1** Synthetic routes of triphenylamine (TPA)-chalcone derivative **2** and compound **5**

**Synthesis of compound 1.**<sup>S1</sup> Triphenylamine (10 g, 40.8 mmol) was dissolved in DMF (100 mL), then POCl<sub>3</sub> (7.5 mL, 80.2 mmol) was slowly added and stirred at 0-5 °C for 30 min. Subsequently, the reaction mixture was allowed to warm up to 90 °C and stirred to react overnight. The resultant solution was quenched by water, then the residue was filtered out and washed with water for several times. The solid was dissolved in DCM, dried over anhydrous Na<sub>2</sub>SO<sub>4</sub> and the solvent was removed under reduced pressure. The crude product was purified by column chromatography (Hex:EtOAc = 100:1, v/v) to afford compound **1** as a white solid (8.92 g, yield 80%). <sup>1</sup>H-NMR (500 MHz, CDCl<sub>3</sub>,  $\delta$  ppm): 9.81 (s, 1H); 7.69-7.66 (m, 2H); 7.36-7.32 (m, 4H); 7.18-7.15 (m, 6H); 7.03-7.00 (m, 2H).

**Synthesis of compound 2.**<sup>S2</sup> A solution of 2'-hydroxyacetophenone (3.6 g, 26.4 mmol) in EtOH (100 mL) was added 30 mL KOH solution (4.35 g, 66.0 mmol), followed by the addition of compound **1** (6.0 g, 22 mmol) at 0 °C and stirred for 30 min. The reaction mixture was continuously stirred at 70 °C for 3 h. After removal of EtOH, water was added and the solution was neutralized with diluted HCl to pH = 4. The precipitate was filtered out, washed with water and pentane for several times. The solid was dried in vacuum at 60 °C for 6 h to obtain compound **2** as an orange-red solid (6.11 g, yield 71%). <sup>1</sup>H NMR (400 MHz, CDCl<sub>3</sub>,  $\delta$

ppm): 13.01 (s, 1H); 7.92-7.87 (m, 2H); 7.54-7.46 (m, 4H); 7.34-7.30 (m, 4H); 7.18-7.11 (m, 6H); 7.05-7.01 (m, 2H); 6.95-6.91 (m, 1H).

**Synthesis of compound 3.**<sup>S3</sup> Potassium phthalimide (7.5 g, 40 mmol) and K<sub>2</sub>CO<sub>3</sub> (13.8 g, 100 mmol) were mixed in ACN (400 mL) and stirred at 90 °C for 15 min. Then, 1,10-dibromodecane (60 g, 200 mmol) was added and refluxed under N<sub>2</sub> atmosphere for 3 h. The solid was removed by filtration, the filtrate was concentrated under reduced pressure and the residue was extracted with DCM (2×50 mL). The organic layer was collected, dried over anhydrous Na<sub>2</sub>SO<sub>4</sub> and concentrated by rotary evaporator. The crude product was purified by column chromatography using Hex:EtOAc = 100:1 to 25:1 (v/v) eluent to acquire compound **3** as a white solid (13 g, yield 89%). <sup>1</sup>H NMR (400 MHz, CDCl<sub>3</sub>, δ ppm): 7.85-7.80 (m, 2H); 7.72-7.67 (m, 2H); 3.66 (t, J = 7.4 Hz, 2H); 3.38 (t, J = 7.0 Hz, 2H); 1.86-1.79 (m, 2H); 1.43-1.37 (m, 2H); 1.36-1.24 (m, 12H).

**Synthesis of compound 4.**<sup>S3</sup> A solution of compound **3** (6 g, 16.38 mmol) in DMF (100 mL) was added NaN<sub>3</sub> (2.7 g, 41.54 mmol) and stirred at 90 °C under N<sub>2</sub> atmosphere overnight. The reaction was quenched by water, followed by extraction with EtOAc (3×50 mL). The organic layer was dried over anhydrous Na<sub>2</sub>SO<sub>4</sub> and solvents were removed under reduced pressure to yield compound **4** as a pale yellow solid (5.11 g, yield 95%). <sup>1</sup>H NMR (500 MHz, CDCl<sub>3</sub>, δ ppm): 7.86-7.81 (m, 2H); 7.72-7.68 (m, 2H); 3.67 (t, J = 7.4 Hz, 2H); 3.24 (t, J = 6.8 Hz, 2H); 1.70-1.64 (m, 2H); 1.61-1.54 (m, 2H); 1.37-1.25 (m, 12H).

**Synthesis of compound 5.**<sup>S3</sup> Compound **4** (4.0 g, 12.18 mmol) and N<sub>2</sub>H<sub>4</sub>·H<sub>2</sub>O (4 ml, 128.8 mmol) were dissolved in EtOH (200 mL), then refluxed under N<sub>2</sub> gas protection overnight. The resultant solution was filtered, washed with cool EtOH and the filtrate was concentrated under reduced pressure, followed by the extraction with DCM (3×50 mL) and washed with water twice. The organic layer was dried over anhydrous Na<sub>2</sub>SO<sub>4</sub> and DCM was removed by rotary evaporator to afford compound **5** (10-azidodecan-1-amine) as a slight yellow oil (2.1 g, yield 87%). <sup>1</sup>H NMR (400 MHz, CDCl<sub>3</sub>, δ ppm): 3.23 (t, J = 6.6 Hz, 2H); 2.66 (t, J = 7.0 Hz, 2H); 1.61-1.54 (m, 2H); 1.44-1.38 (m, 2H); 1.36-1.23 (m, 12H).

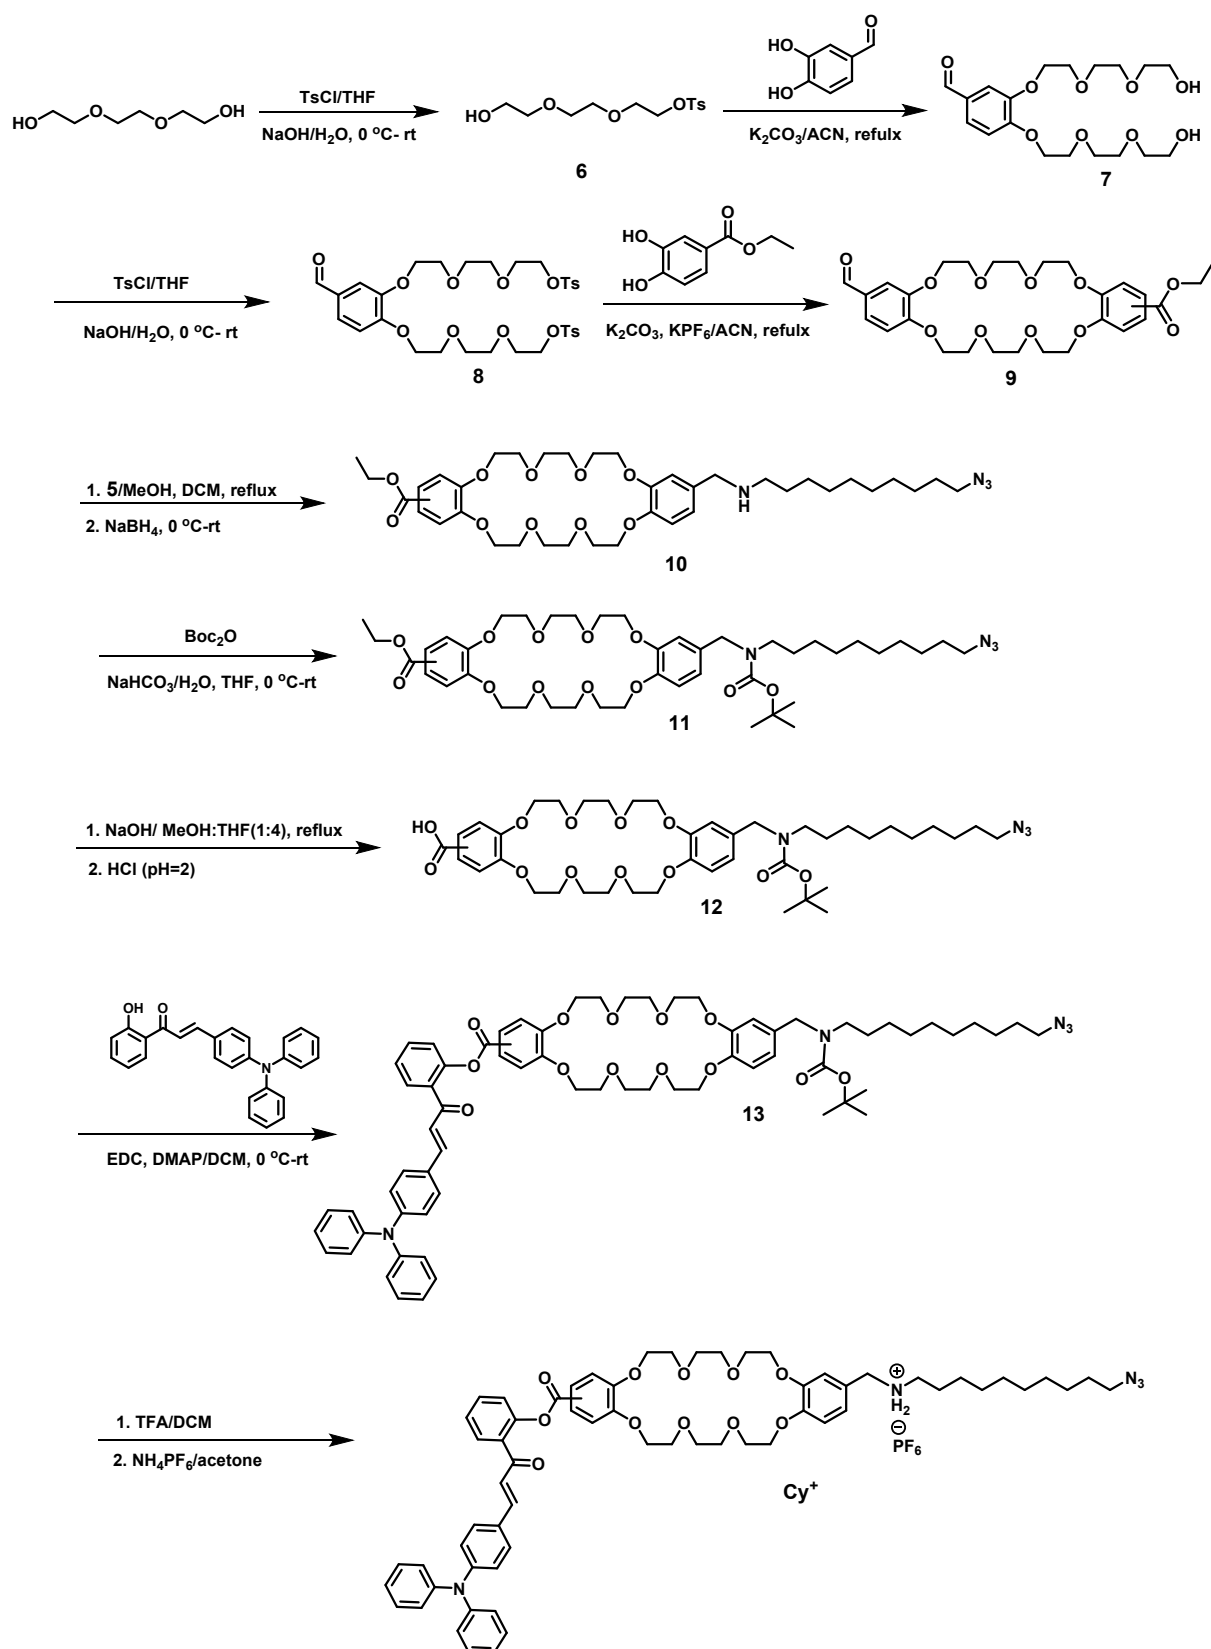

**Scheme S2** Synthetic routes of TPA-chalcone host-bearing ammonium guest Cy<sup>+</sup>

**Synthesis of compound 6.**<sup>S4</sup> An aqueous NaOH (40 g, 1.0 mol, 200 mL) solution was added into the solution of triethylene glycol (75 g, 0.5 mol) in THF (200 mL) at 0-5 °C. Then, *p*-toluenesulfonyl chloride (115 g, 0.6 mol) in THF (200 mL) was added dropwise, maintaining the reaction temperature below 5 °C. Subsequently, the reaction mixture was stirred at room temperature for further 3 h under N<sub>2</sub> atmosphere. The solvent was removed, the residue was extracted with EtOAc, dried over anhydrous Na<sub>2</sub>SO<sub>4</sub> and the obtained solution was concentrated under reduced pressure. The crude product was purified by column chromatography with Hex:DCM = 4:1 to EtOAc:DCM = 4:1 (v/v) to achieve compound **6** as a pale yellow oil (92.8 g, yield 61%). <sup>1</sup>H NMR (500 MHz, CDCl<sub>3</sub>, δ ppm): 7.76 (d, J = 10.0 Hz, 2H); 7.33-7.30 (m, 2H); 4.15-4.12 (m, 2H); 3.68-3.66 (m, 4H); 3.57 (s, 4H); 3.55-3.52 (m, 2H); 2.47-2.46 (m, 1H); 2.41 (s, 3H).

**Synthesis of compound 7.**<sup>S5</sup> A mixture of 3,4-dihydroxybenzaldehyde (5 g, 36.2 mmol) and K<sub>2</sub>CO<sub>3</sub> (20.2 g, 144.8 mmol) in ACN (100 mL) was stirred at 90 °C under N<sub>2</sub> atmosphere for 15 min, followed by the addition of compound **6** (27.6 g, 90.7 mmol) and the reaction mixture was refluxed for 24 h. After filtering off solids, the filtrate was concentrated under reduced pressure, the residue was extracted with DCM (3×50 mL) and washed with brine. The solution was dried over anhydrous Na<sub>2</sub>SO<sub>4</sub> and concentrated under reduced pressure. The crude product was purified by column chromatography using an eluent of EtOAc:DCM:MeOH = 25:25:1 (v/v/v) to obtain compound **7** as a pale yellow oil (11.5 g, yield 79%). <sup>1</sup>H-NMR (400 MHz, CDCl<sub>3</sub>, δ ppm): 9.79 (s, 1H); 7.42-7.39 (m, 2H); 7.95 (d, J = 8.0 Hz, 1H); 4.22-4.18 (m, 4H); 3.90-3.85 (m, 4H); 3.74-3.71 (m, 4H); 3.69-3.66 (m, 4H); 3.65-3.63 (m, 4H); 3.57-3.55 (m, 4H); 3.11 (s, 2H).

**Synthesis of compound 8.**<sup>S5</sup> A solution of NaOH (4.82 g, 120.6 mmol) was added to compound **7** (8.1 g, 20.1 mmol) in THF (100 mL) at 0-5 °C, followed by the addition of TsCl (15.33 g, 80.4 mmol) in THF (100 mL). Subsequently, the reaction mixture was allowed to warm up to room temperature and stirred for further 3 h under N<sub>2</sub> gas protection. The solvent was removed, the residue was extracted with EtOAc, dried over anhydrous Na<sub>2</sub>SO<sub>4</sub> and the solution was concentrated under reduced pressure. The crude product was purified by column chromatography with Hex:EtOAc = 1:1 to 1:1.5 (v/v) mixed solvents to obtain compound **8** as a pale yellow oil (12.86 g, yield 90%). <sup>1</sup>H NMR (500 MHz, CDCl<sub>3</sub>, δ ppm): 9.80 (s, 1H); 7.76-7.75 (m, 4H); 7.43-7.41 (m, 1H); 7.40 (d, J = 1.5 Hz, 1 H); 7.30 (d, J = 3.0 Hz, 4H);

6.98 (d,  $J = 8.5$  Hz, 1H); 4.20 (t,  $J = 5.0$  Hz, 2H); 4.16 (t,  $J = 4.75$  Hz, 2H); 4.13-4.11 (m, 4H); 3.85 (t,  $J = 4.75$  Hz, 2H); 3.82 (t,  $J = 5.0$  Hz, 2H); 3.67-3.64 (m, 8H); 3.59-3.57 (m, 4H); 2.40 (s, 6H).

**Synthesis of compound 9.**<sup>S5</sup> Compound **8** (5.83 g, 8.2 mmol) was added to a mixture of ethyl 3,4-dihydroxybenzoate (1.5 g, 8.2 mmol),  $K_2CO_3$  (3.4 g, 24.6 mmol) and  $KPF_6$  (2.27 g, 12.3 mmol) in ACN (200 mL). The reaction mixture was stirred at reflux under  $N_2$  atmosphere for 24 h. The resultant solution was filtered and concentrated under reduced pressure. Then, the residue was further extracted with EtOAc (3×50 mL) and washed with water for several times. The organic layer was dried over anhydrous  $Na_2SO_4$ , then EtOAc was evaporated under reduced pressure and the crude product was purified by column chromatography using DCM:EtOAc = 1:5 (v/v) eluent to afford compound **9** as a white solid (3.02 g, yield 67%).  $^1H$  NMR (400 MHz,  $CDCl_3$ ,  $\delta$  ppm): 9.78 (s, 1H); 7.62 (dd,  $J = 2.0$  Hz,  $J = 8.4$  Hz, 1H); 7.49 (d,  $J = 1.6$  Hz, 1H); 7.40 (dd,  $J = 2.0$  Hz,  $J = 8.4$  Hz, 1H); 7.35 (d,  $J = 1.6$  Hz, 1H); 6.91 (dd,  $J = 2.4$  Hz,  $J = 8.0$  Hz, 1H); 6.82 (d,  $J = 8.4$  Hz, 1H); 4.31 (q,  $J = 7.2$  Hz, 2H); 4.20-4.16 (m, 8H); 3.94-3.90 (m, 8H); 3.84-3.78 (m, 8H); 1.34 (t,  $J = 7.0$  Hz, 3H).

**Synthesis of compound 10.** Compound **9** (3.0 g, 5.5 mmol) and compound **5** (1.31 g, 6.6 mmol) were dissolved in 100 mL of MeOH:DCM (1:1, v/v), then a few drops of catalytic  $CH_3COOH$  were added. The reaction mixture was refluxed for 24 h under  $N_2$  gas protection. The obtained solution was cooled down to 0 °C, then  $NaBH_4$  (1.25 g, 33.0 mmol) was slowly added and stirred at room temperature for 3 h. Water was added to quench reaction, then organic solvents were removed under reduced pressure and pH of solution was adjusted to 5 by HCl solution. Then, the solution was extracted with DCM (2×50 mL), DCM layer was dried over anhydrous  $Na_2SO_4$  and evaporated under reduced pressure. The crude product was purified by column chromatography using a gradient solvent system from DCM:EtOAc:MeOH = 40:40:1 (v/v/v) to DCM:MeOH = 5:1 (v/v) to get compound **10** as a white solid (3.32 g, yield 83%).  $^1H$  NMR (400 MHz,  $CDCl_3$ ,  $\delta$  ppm): 7.65-7.62 (m, 1H); 7.52 (d,  $J = 2.0$  Hz, 1H); 7.13 (t,  $J = 2.4$  Hz, 1H); 6.90 (d,  $J = 8.0$  Hz, 1H); 6.84 (dd,  $J = 1.2$  Hz,  $J = 8.4$  Hz, 1H); 6.78-6.79 (dd,  $J = 2$  Hz,  $J = 8.4$  Hz, 1H); 4.33 (q,  $J = 7$  Hz, 2H); 4.21-4.17 (m, 6H); 4.12-4.09 (m, 2H); 3.94-3.92 (m, 8H); 3.83-3.81 (m, 8H); 3.26-3.22 (m, 2H); 2.81 (t,  $J = 7.6$  Hz, 1H); 2.66 (t,  $J = 7.8$  Hz, 2H); 1.68-1.62 (m, 2H); 1.60-1.53 (m, 2H); 1.36 (t,  $J = 7.2$  Hz, 3H); 1.34-1.23 (m, 12H).

**Synthesis of compound 11.** Compound **10** (3.0 g, 4.1 mmol) was dissolved in THF (50 mL), a solution of NaHCO<sub>3</sub> (1.04 g, 12.3 mmol) in water (50 mL) was then added and stirred around 0 °C for 10 min. Subsequently, *di-tert*-butyl dicarbonate (1.35 g, 6.2 mmol) was added, the reaction mixture was allowed to warm up to room temperature and stirred for 2 h under N<sub>2</sub> atmosphere. The resultant solution was neutralized to pH = 5 by citric acid solution, THF was then removed, the solution was extracted with DCM (2×50 mL), dried over anhydrous Na<sub>2</sub>SO<sub>4</sub> and concentrated under reduced pressure. The residue was washed with pentane for several times and dried for 5 h under vacuum to afford compound **11** as a white solid (3.0 g, yield 88%). <sup>1</sup>H NMR (500 MHz, CDCl<sub>3</sub>, δ ppm): 7.65-7.63 (m, 1H); 7.52 (d, J = 2.0 Hz, 1H); 6.84 (d, J = 8.5 Hz, 1H); 6.84 (d, J = 8.5 Hz, 1H); 6.79-6.71 (m, 3H); 4.35-4.30 (3, 4H); 4.20-4.18 (m, 4H); 4.13-4.11 (m, 4H); 3.94-3.90 (m, 8H); 3.87-3.82 (m, 8H); 3.24 (t, J = 7.0 Hz, 2H); 3.15-3.05 (m, 2H); 1.75 (s, 2H); 1.61-1.55 (m, 2H); 1.46 (s, 9H); 1.37 (t, J = 7.0 Hz, 3J); 1.33-1.20 (m, 12H).

**Synthesis of compound 12.** A 20 mL aqueous solution of NaOH (0.24 g, 6.0 mmol) was added to a solution of compound **11** (2.5 g, 3.0 mmol) in 100 ml MeOH:THF (1:4, v/v), then the reaction mixture was stirred and refluxed at 80 °C overnight. The organic solvents were removed under reduced pressure, then water and HCl solution were added to adjust pH = 2. The precipitate was filtered, washed with water a few times and the obtained solid was dissolved in DCM, dried over anhydrous Na<sub>2</sub>SO<sub>4</sub> and concentrated under reduced pressure to yield compound **12** as a white solid (2.18 g, yield 91%). <sup>1</sup>H NMR (500 MHz, DMSO-*d*<sub>6</sub>, δ ppm): 12.63 (s, 1H); 7.54 (dd, J = 2.0 Hz, J = 8.5 Hz, 1H); 7.43 (d, J = 2.0 Hz, 1H); 7.03 (d, J = 8.0 Hz, 1H); 6.84 (d, J = 8.5 Hz, 1H); 6.89 (d, J = 8.5 Hz, 1H); 6.82 (s, 1H); 6.74 (dd, J = 2.0 Hz, J = 8.0 Hz, 1H); 4.25 (s, 1H); 4.14 (t, J = 4 Hz, 2H); 4.10 (t, J = 4.25 Hz, 2H); 4.05-4.02 (m, 4H); 3.79-3.73 (m, 8H); 3.68-6.64 (m, 8H); 3.29 (t, J = 7.0 Hz, 2H); 3.06 (s, 2H); 1.53-1.48 (m, 2H); 1.41-1.36 (m, 11H); 1.32-1.14 (m, 12H).

**Synthesis of compound 13.** Compound **12** (2.0 g, 2.5 mmol), EDC (1.06 g, 5.5 mmol) and DMAP (0.15 g, 1.23 mmol) were dissolved in dry DCM (50 mL) and stirred at 0 °C for 1 h. Then, compound **2** (1.57 g, 4.0 mmol) was added and the mixture was stirred at room temperature overnight. Water was added to the resultant solution, the organic layer was collected and concentrated under reduced pressure. The crude product was purified by column chromatography (DCM to DCM:EtOAc = 4:1, v/v) to obtain compound **13** as a yellowish-orange solid (2.68 g, yield 91%). <sup>1</sup>H-NMR (400 MHz, CDCl<sub>3</sub>, δ ppm): 7.78-7.75

(m, 1H); 7.69 (dd,  $J = 1.6$  Hz,  $J = 7.6$  Hz, 1H); 7.57-7.53 (m, 2H); 7.50-7.46 (m, 2H); 7.38-7.33 (m, 1H); 7.32-7.25 (m, 7H); 7.12-7.12 (m, 6H); 6.99-6.95 (m, 1H); 6.93-6.89 (m, 2H); 6.83 (dd,  $J = 1.2$  Hz,  $J = 8.8$  Hz, 1H); 6.82-6.72 (m, 3H); 4.32 (s, 2H); 4.19-4.11 (m, 8H); 3.94-3.87 (m, 8H); 3.83-3.81 (m, 8H); 3.24 (t,  $J = 7.0$  Hz, 2H); 3.15-3.07 (m, 2H); 1.62-1.55 (m, 2H); 1.47-1.43 (m, 11H); 1.37-1.19 (m, 12H).

**Synthesis of Cy<sup>+</sup>.** Compound **13** (2.0 g, 1.7 mmol) was dissolved in DCM (100 mL), followed by the addition of trifluoroacetic acid (3 mL) at 0 °C. The mixture was allowed to warm up to room temperature and stirred for 3 h. Then, water was added to the resultant solution, the organic layer was collected and concentrated under reduced pressure after extraction by DCM. The intermediate salt was dispersed in 50 mL acetone, the saturated solution of NH<sub>4</sub>PF<sub>6</sub> in 10 mL H<sub>2</sub>O was then added and stirred at room temperature for 1 h. The solvent was removed, the residue was filtered and washed with de-ionized water for several times. The solid was re-dissolved in DCM, dried over anhydrous Na<sub>2</sub>SO<sub>4</sub> and the solution was concentrated under reduced pressure to obtain compound Cy<sup>+</sup> as an orange solid (1.72 g, yield 83%). <sup>1</sup>H NMR (500 MHz, DMSO-*d*<sub>6</sub>,  $\delta$  ppm): 8.54 (s, 2H); 7.86-7.75 (m, 1H); 7.72-7.64 (m, 2H); 7.52-7.41 (m, 4H); 7.39-7.29 (m, 5H); 7.20-7.13 (m, 3H); 7.09-7.04 (m, 6H); 7.01-6.97 (m, 3H); 6.82-6.72 (m, 2H); 4.15-4.02 (m, 10H); 3.80-3.70 (m, 8H); 3.67-6.63 (m, 8H); 3.29 (t,  $J = 6.5$  Hz, 2H); 2.86-2.81 (m, 2H); 1.60-1.53 (m, 2H); 1.53-1.48 (m, 2H); 1.30-1.24 (m, 12H). <sup>13</sup>C NMR (125 MHz, CDCl<sub>3</sub>,  $\delta$  ppm): 192.02, 191.95, 164.64, 152.52, 152.37, 150.46, 148.96, 147.74, 147.61, 146.79, 146.53, 146.33, 146.28, 145.96, 132.94, 132.27, 129.90, 129.81, 129.74, 129.52, 129.38, 127.36, 126.49, 126.10, 125.93, 125.69, 124.87, 124.80, 124.53, 124.51, 123.69, 123.06, 121.93, 121.30, 121.27, 113.25, 112.79, 111.36, 72.50, 72.04, 71.10, 70.95, 70.73, 70.54, 70.33, 70.14, 67.83, 67.32, 67.16, 52.33, 51.63, 51.58, 49.10, 29.50, 29.48, 29.40, 29.27, 29.18, 28.96, 26.94, 26.84. HRMS (ESI<sup>+</sup>) [M-PF<sub>6</sub><sup>-</sup>]<sup>+</sup>: calcd. for C<sub>63</sub>H<sub>974</sub>N<sub>5</sub>O<sub>11</sub><sup>+</sup>, 1076.5379; found, 1076.5413.

Stopper **SP-C<sub>3</sub>H<sub>3</sub>** was synthesized according to our previous publication.<sup>S6</sup> <sup>1</sup>H NMR (400 MHz, CDCl<sub>3</sub>,  $\delta$  ppm): 8.04-8.02 (m, 2H); 7.25-7.22 (m, 1H); 7.13-7.11 (m, 1H); 6.98-6.93 (m, 2H); 6.82 (d,  $J = 6.4$  Hz, 1H); 6.76-6.74 (m, 1H); 6.23 (d,  $J = 6.4$  Hz, 1H); 5.89 (d,  $J = 8.4$  Hz, 1H); 4.07-4.03 (m, 1H); 3.88-3.84 (m, 1H); 2.10 (t,  $J = 2.0$  Hz, 1H); 1.31 (s, 3H); 1.21 (s, 3H).



## 2. Characterizations of intermediate compounds and photo-switchable [c2] daisy chain rotaxane [c2]-SP-Ext

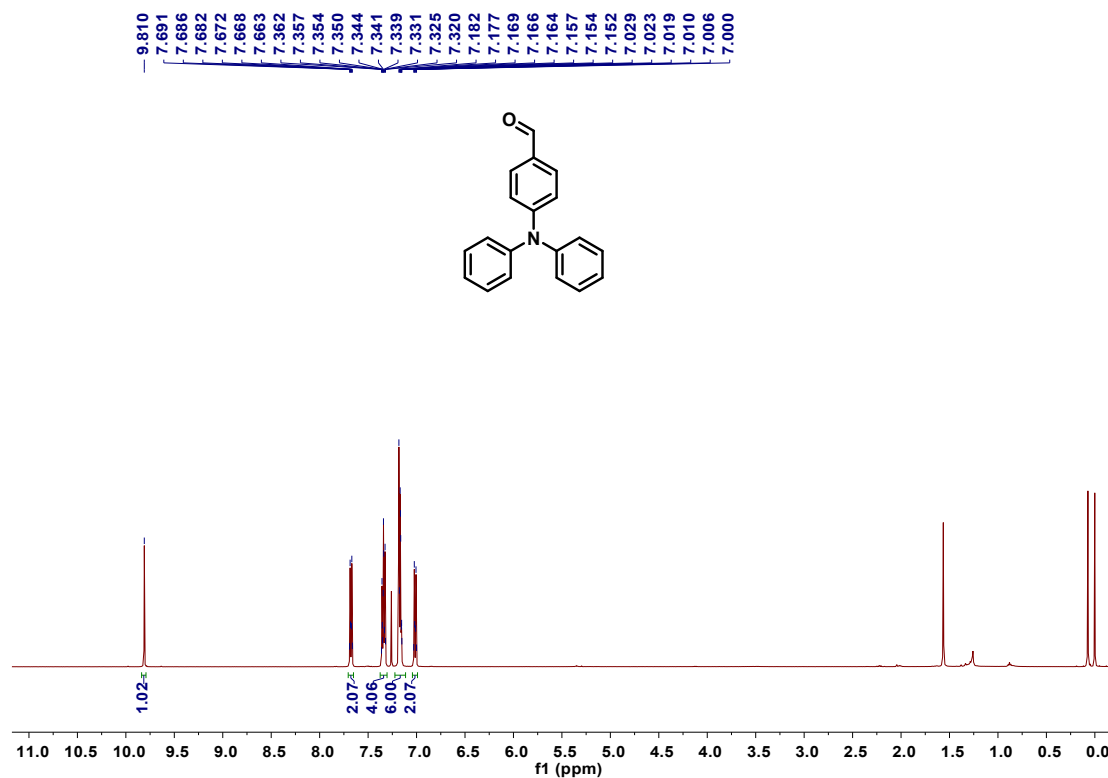

Fig. S1 <sup>1</sup>H NMR spectrum (500 MHz, CDCl<sub>3</sub>) of compound 1.

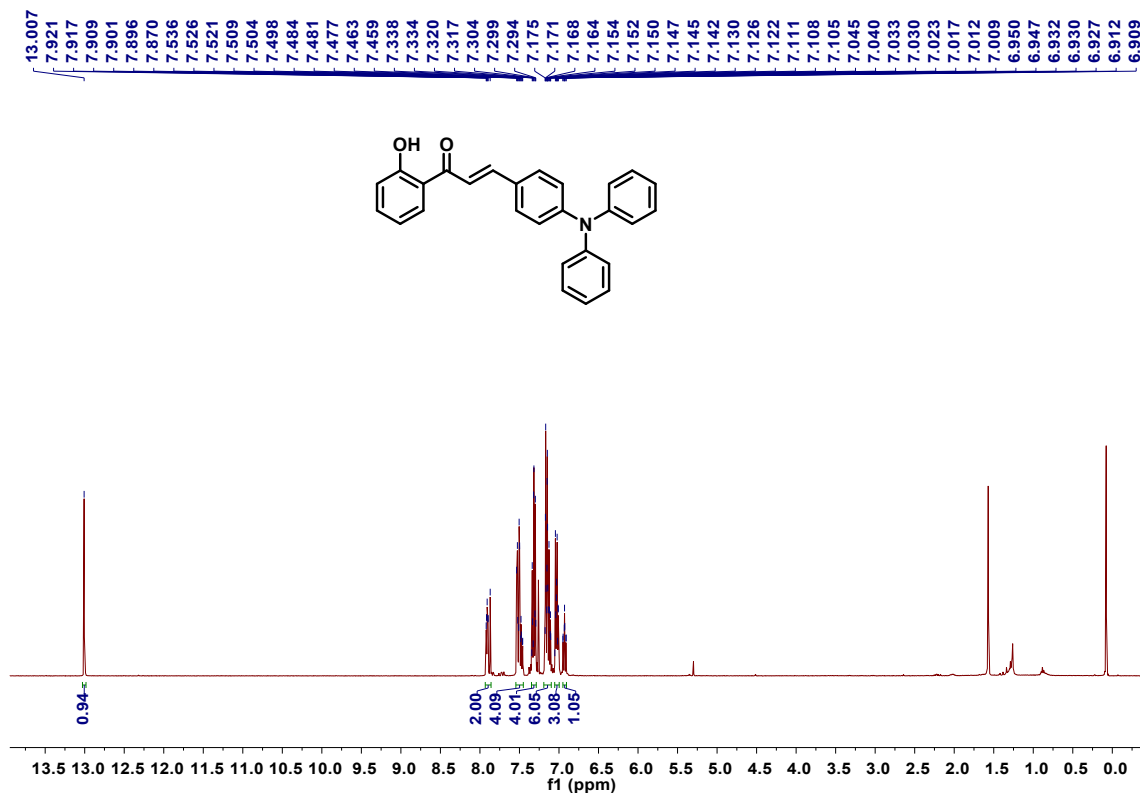

Fig. S2 <sup>1</sup>H NMR spectrum (400 MHz, CDCl<sub>3</sub>) of compound 2.

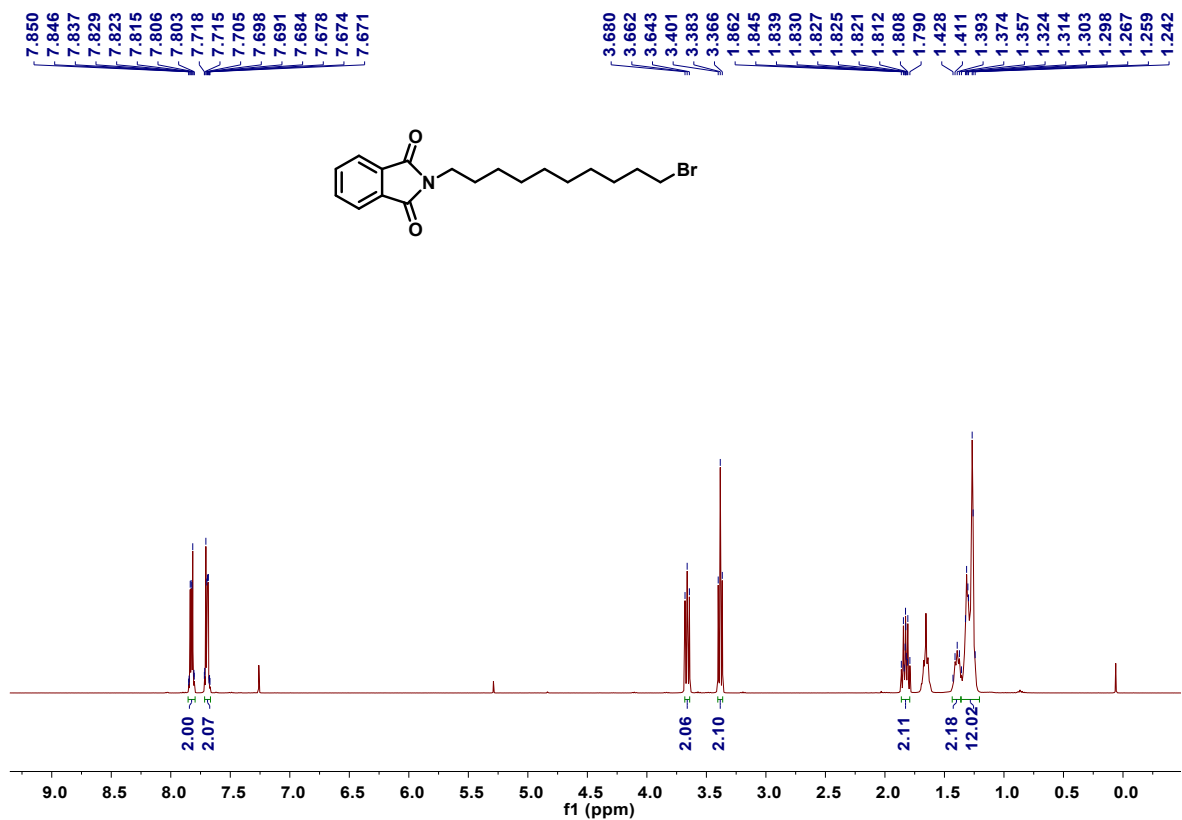

Fig. S3 <sup>1</sup>H NMR spectrum (400 MHz, CDCl<sub>3</sub>) of compound 3.

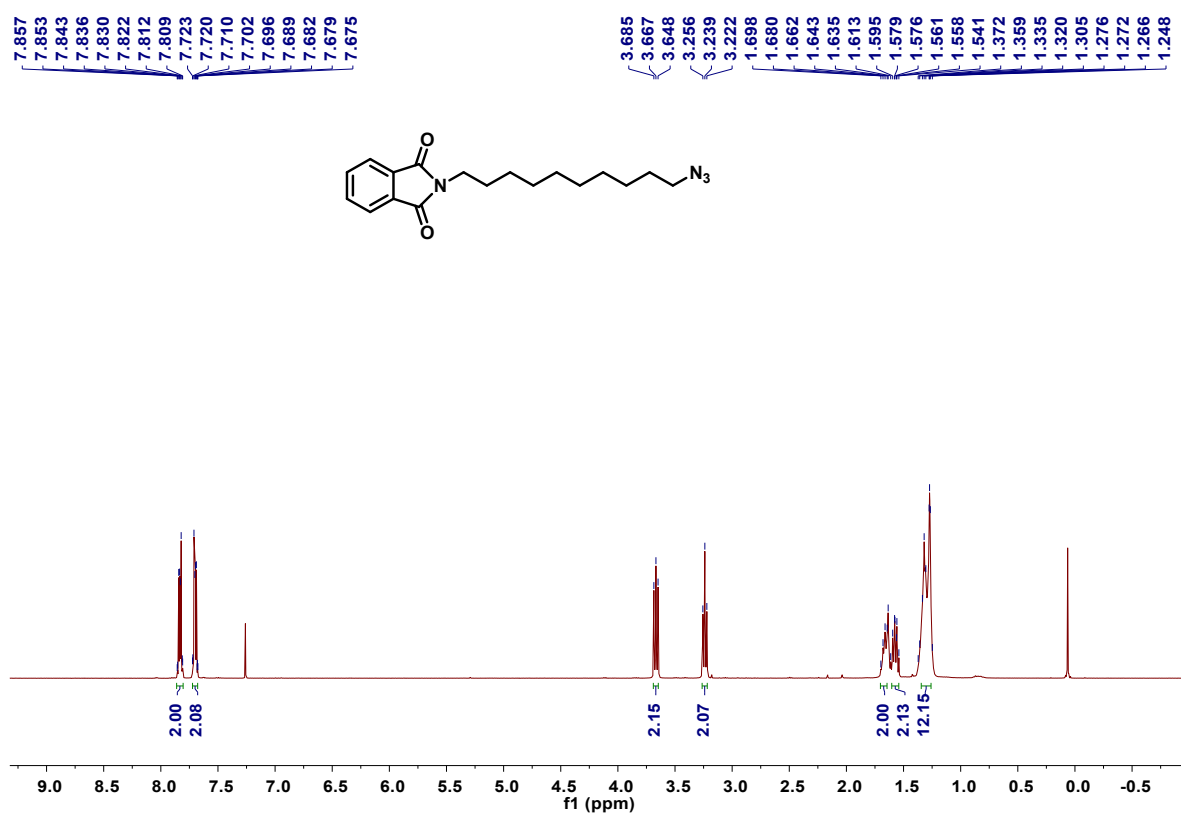

Fig. S4 <sup>1</sup>H NMR spectrum 500 MHz, CDCl<sub>3</sub>) of compound 4.

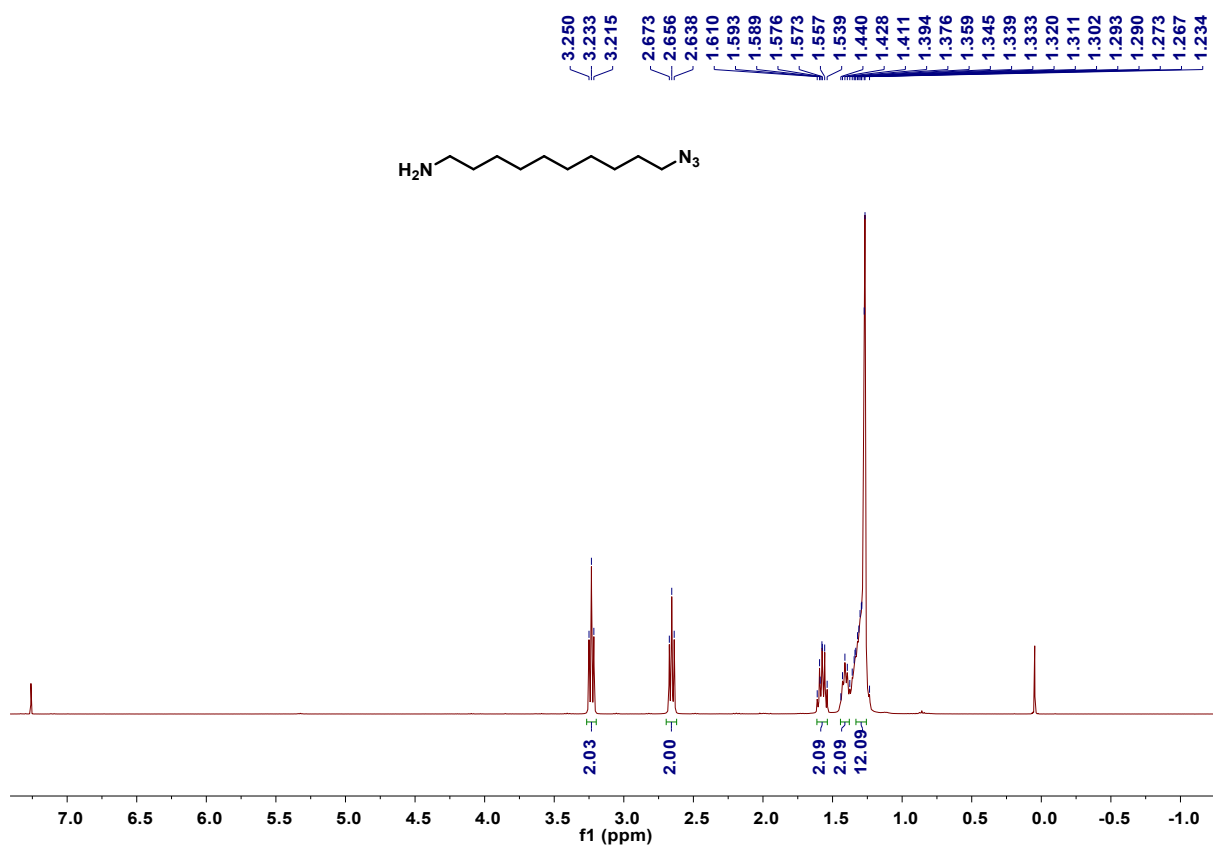

Fig. S5  $^1\text{H}$  NMR spectrum (400 MHz,  $\text{CDCl}_3$ ) of compound 5.

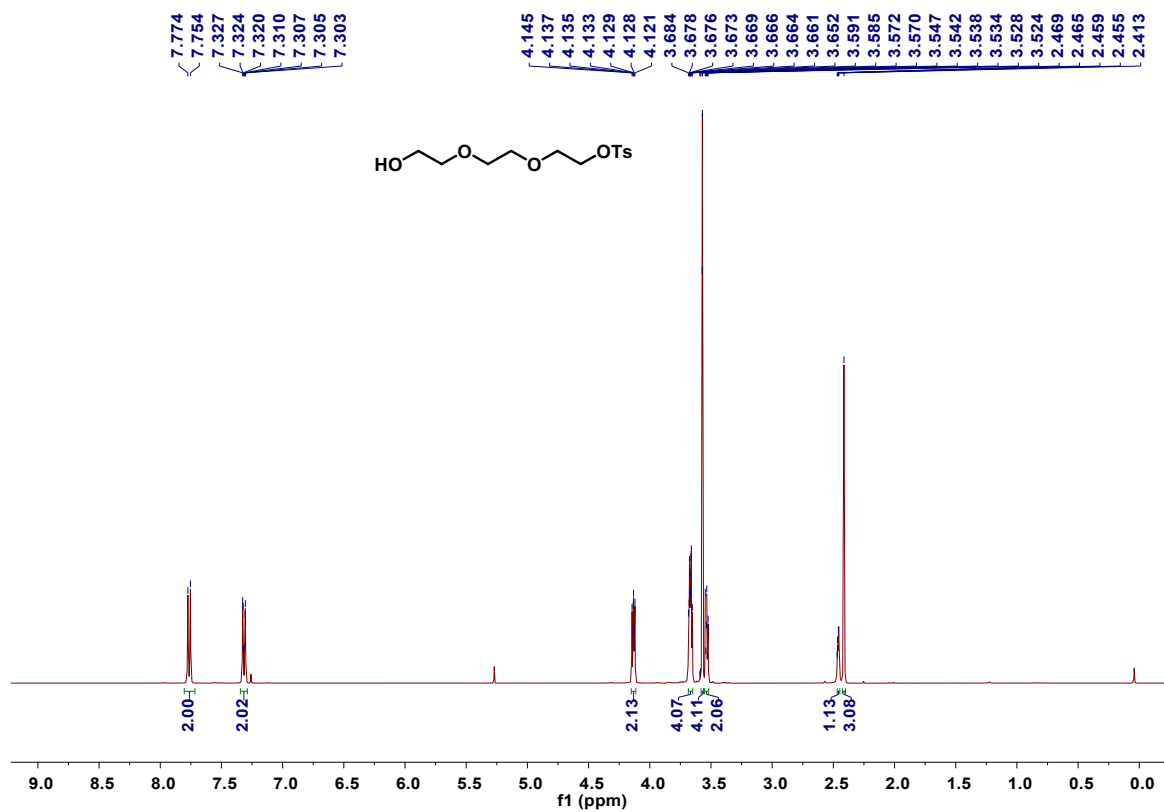

Fig. S6  $^1\text{H}$  NMR spectrum (500 MHz,  $\text{CDCl}_3$ ) of compound 6.

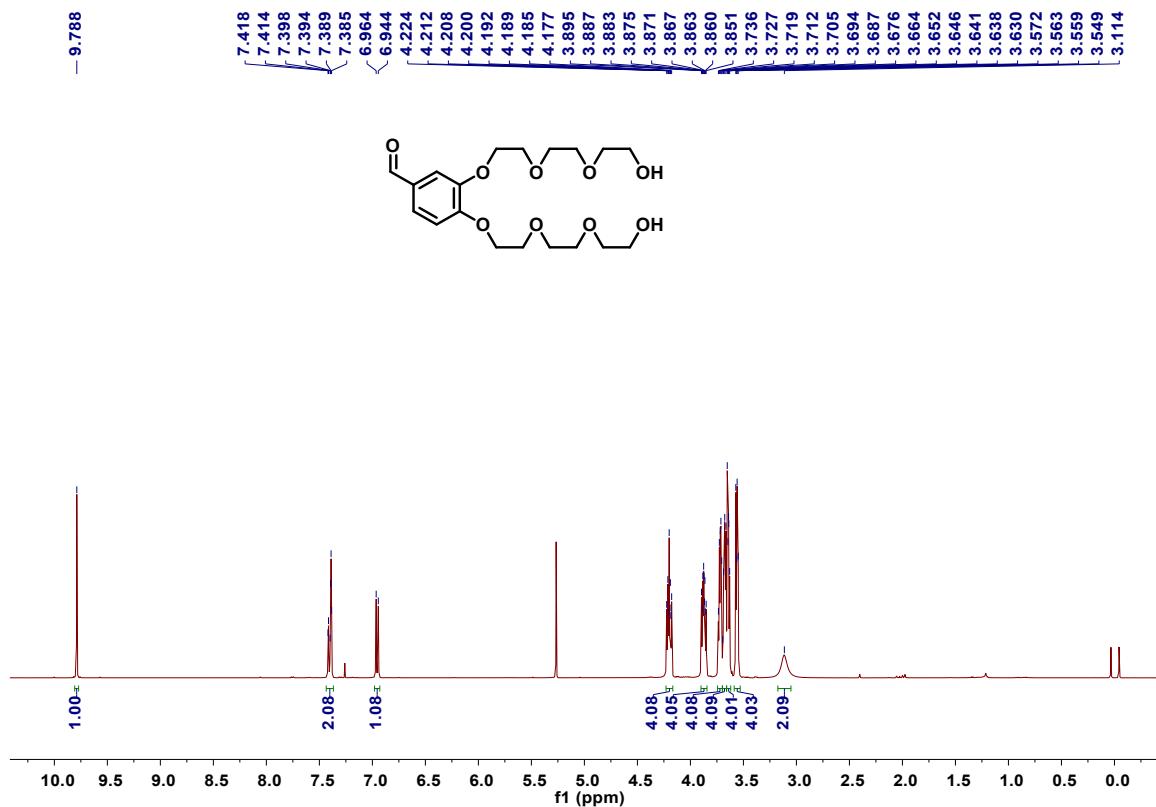

Fig. S7  $^1\text{H}$  NMR spectrum (400 MHz,  $\text{CDCl}_3$ ) of compound 7.

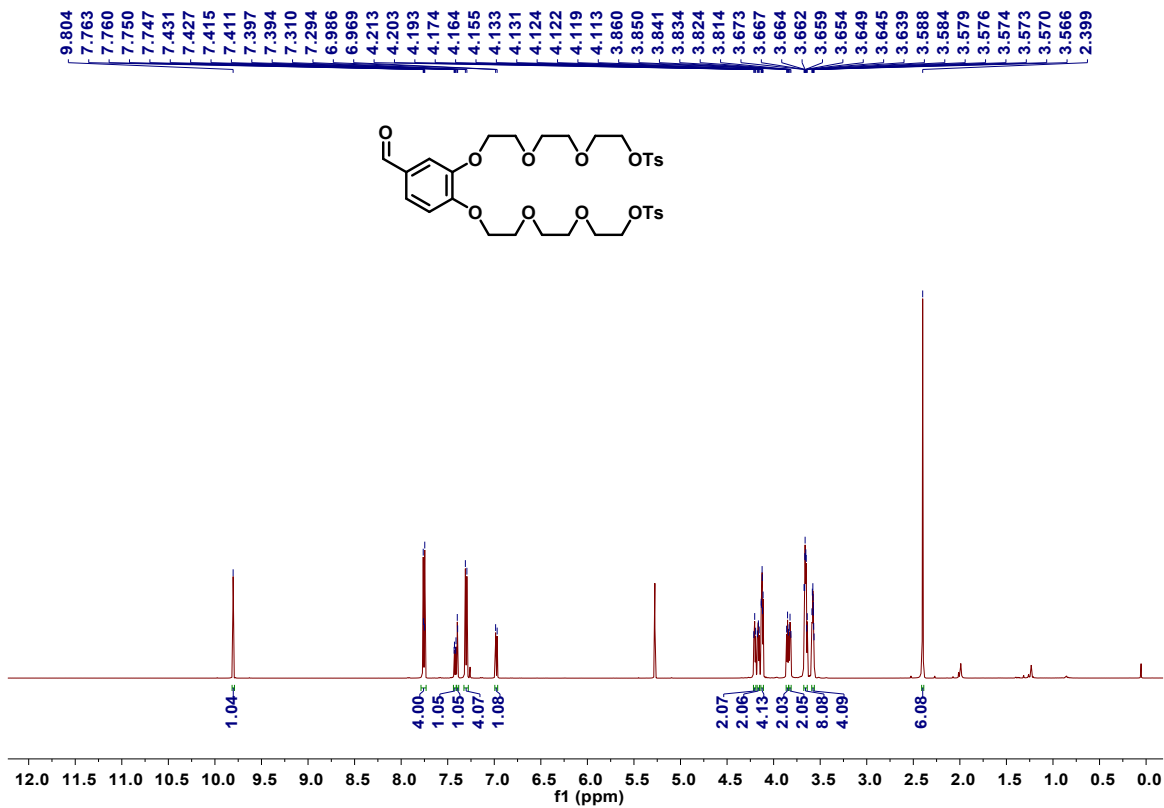

Fig. S8  $^1\text{H}$  NMR spectrum (500 MHz,  $\text{CDCl}_3$ ) of compound 8.





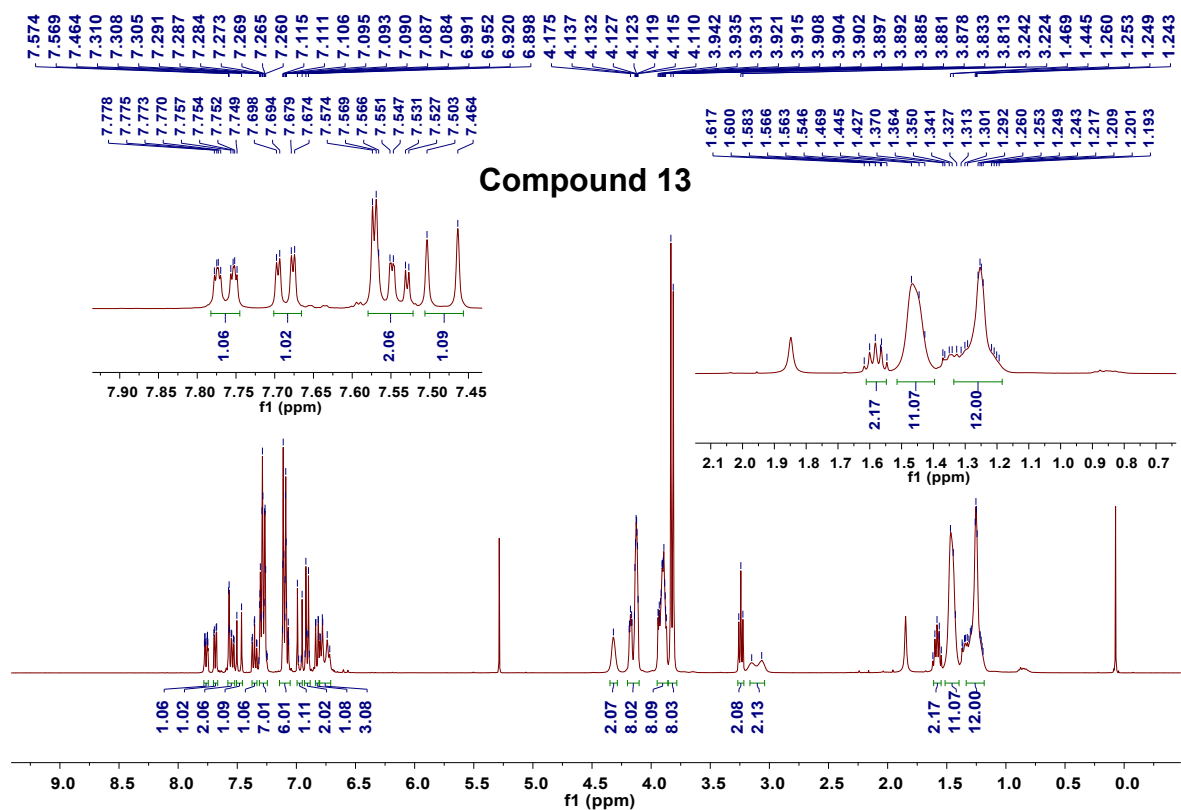

**Fig. S13**  $^1\text{H}$  NMR spectra (400 MHz,  $\text{CDCl}_3$ ) of compound **13**.

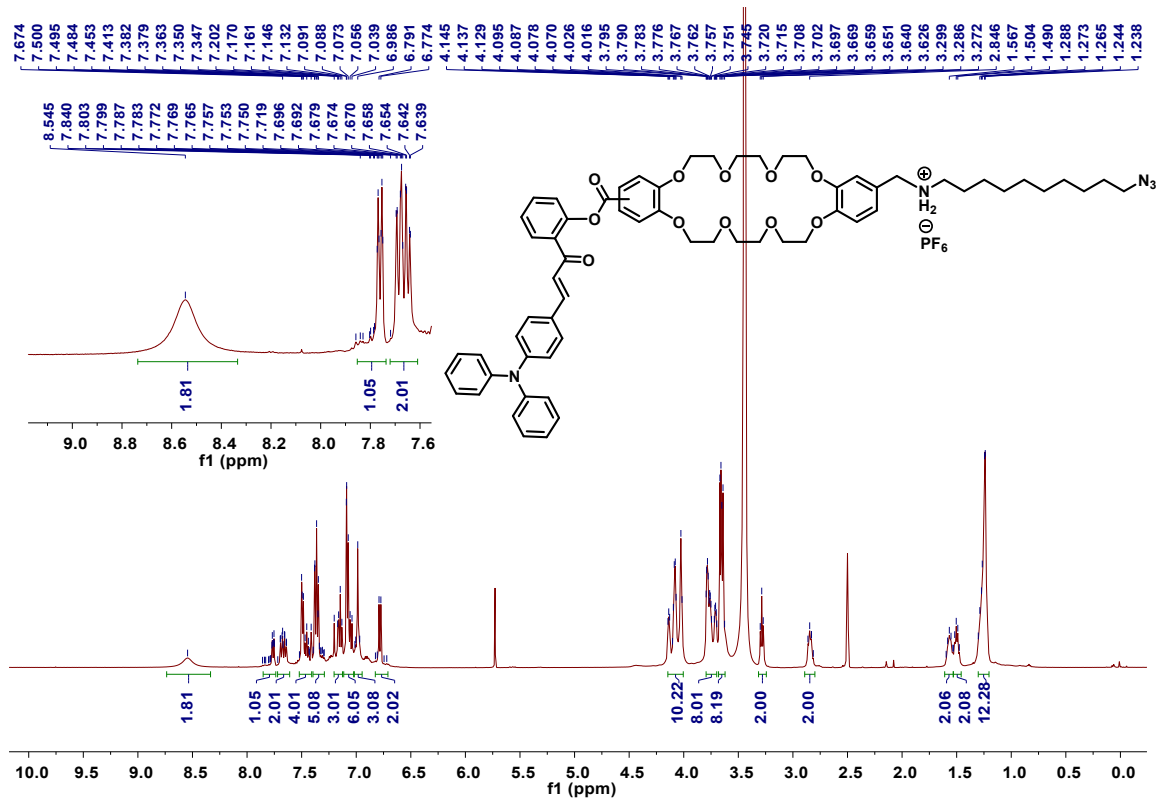

**Fig. S14**  $^1\text{H}$  NMR spectra (500 MHz,  $\text{DMSO}-d_6$ ) of compound **Cy<sup>+</sup>**.

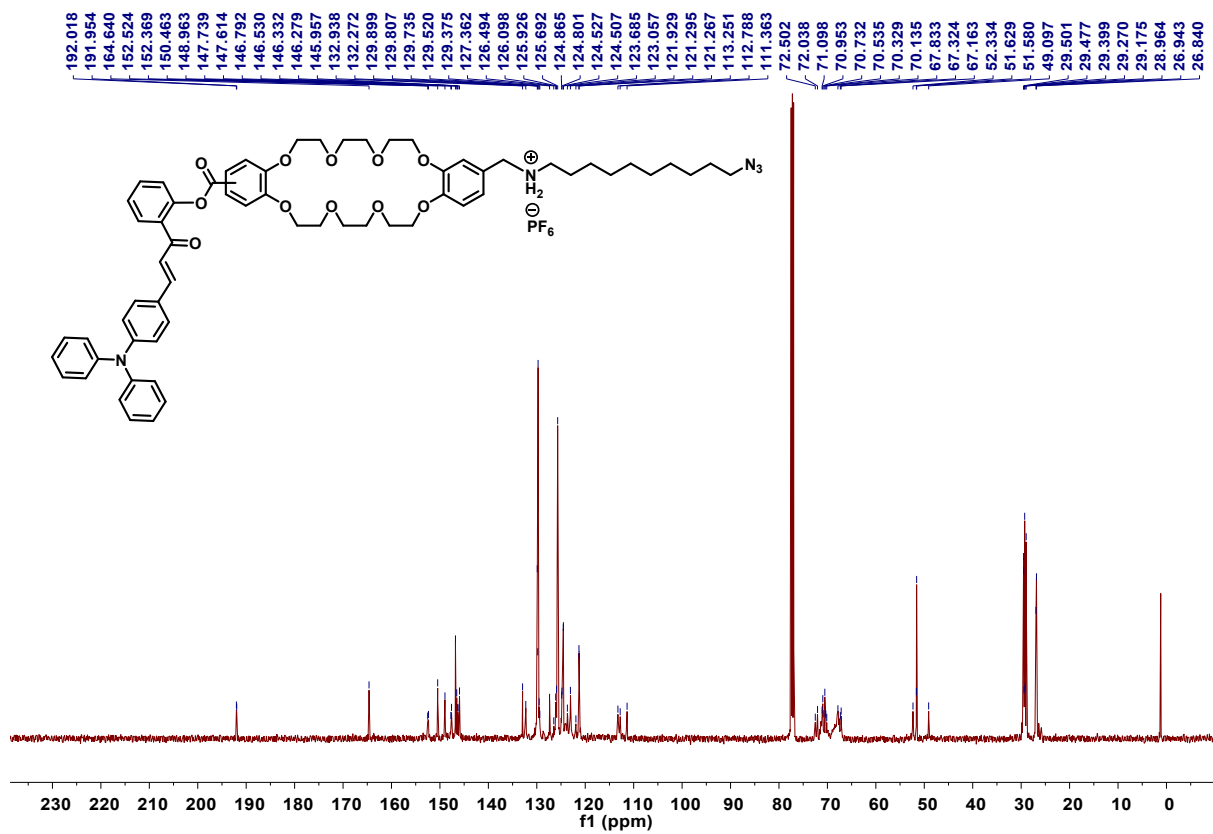

Fig. S15  $^{13}\text{C}$  NMR spectrum (125 MHz,  $\text{CDCl}_3$ ) of compound  $\text{Cy}^+$ .



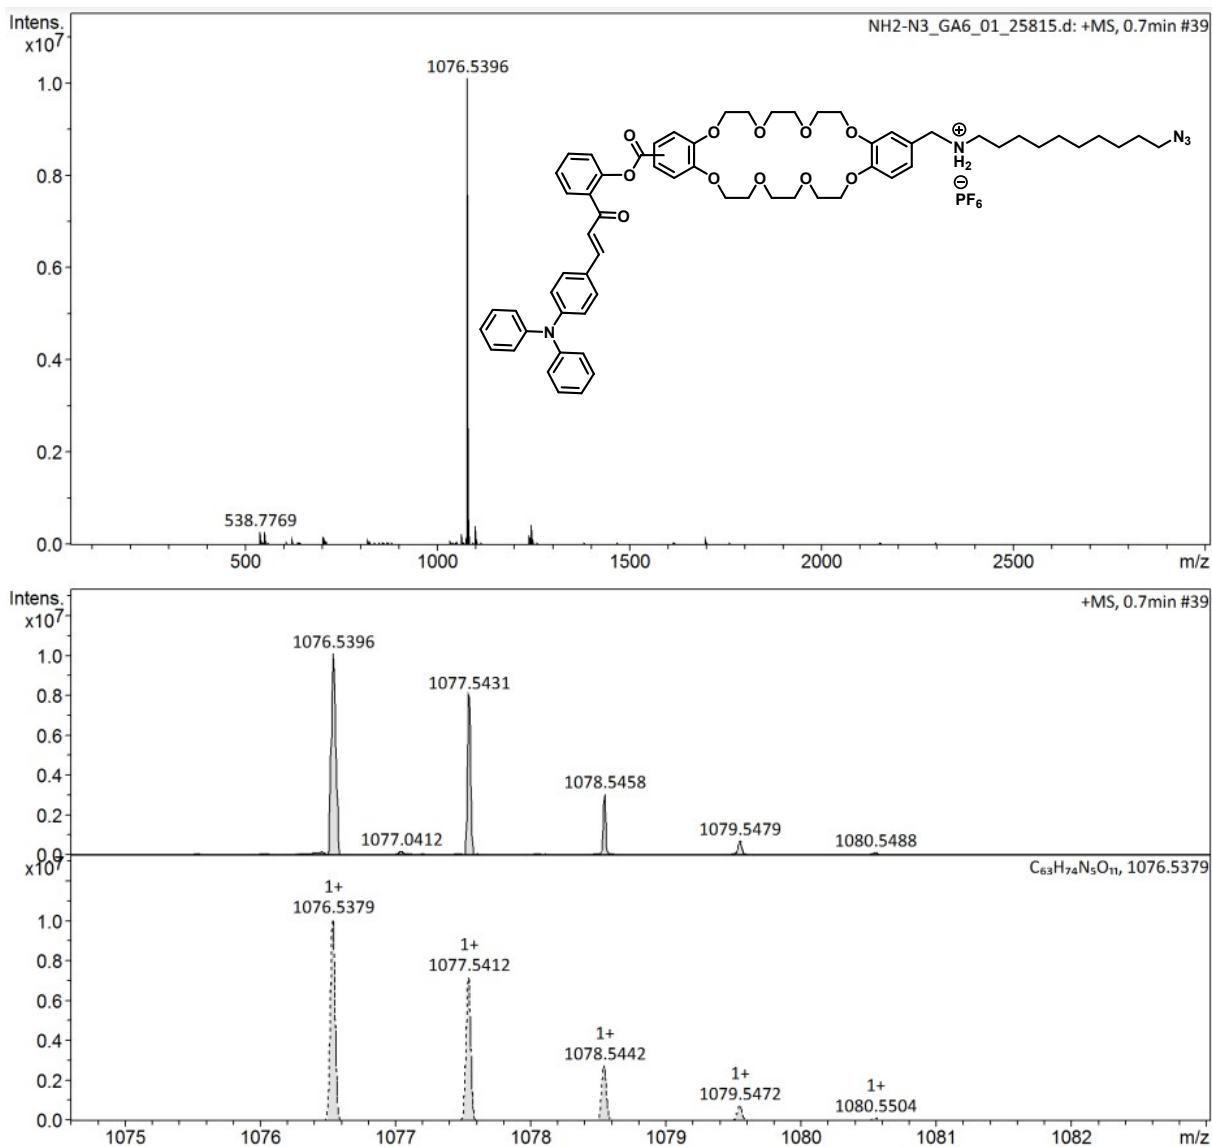

**Fig. S16** HRMS-ESI spectra of compound **Cy<sup>+</sup>**.

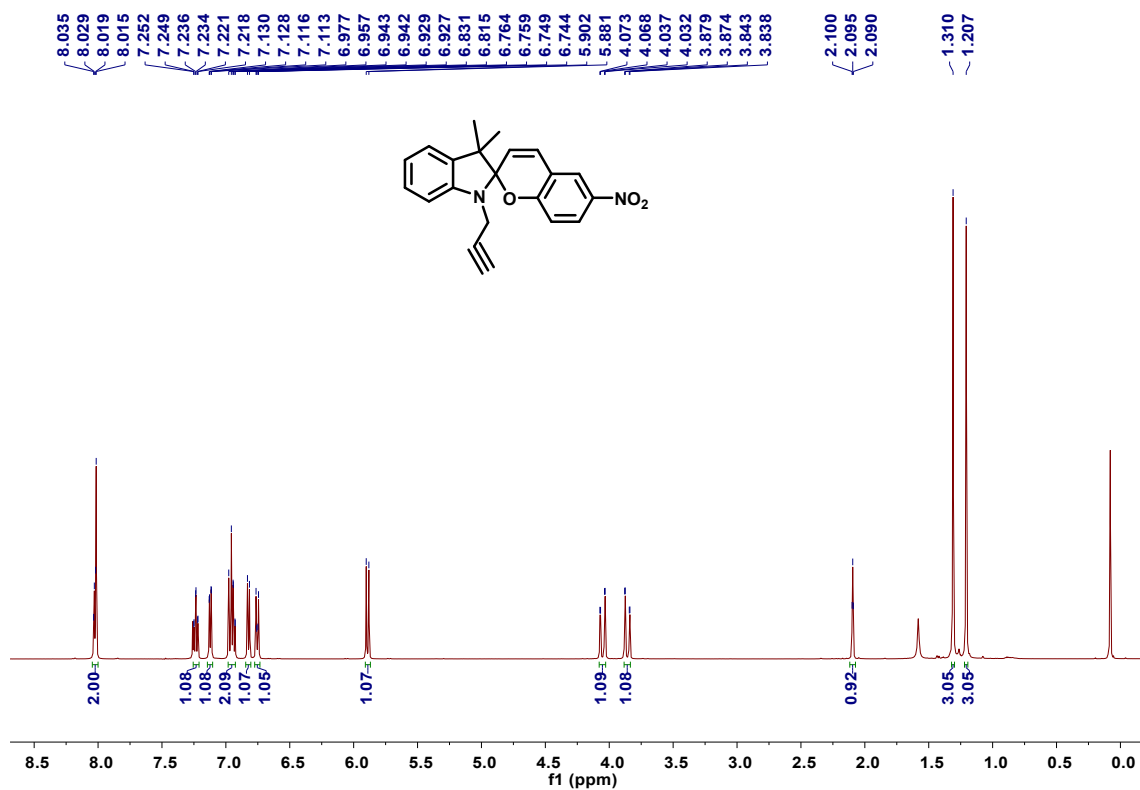

Fig. S17 <sup>1</sup>H NMR spectrum (400 MHz, CDCl<sub>3</sub>) of SP-C<sub>3</sub>H<sub>3</sub>.

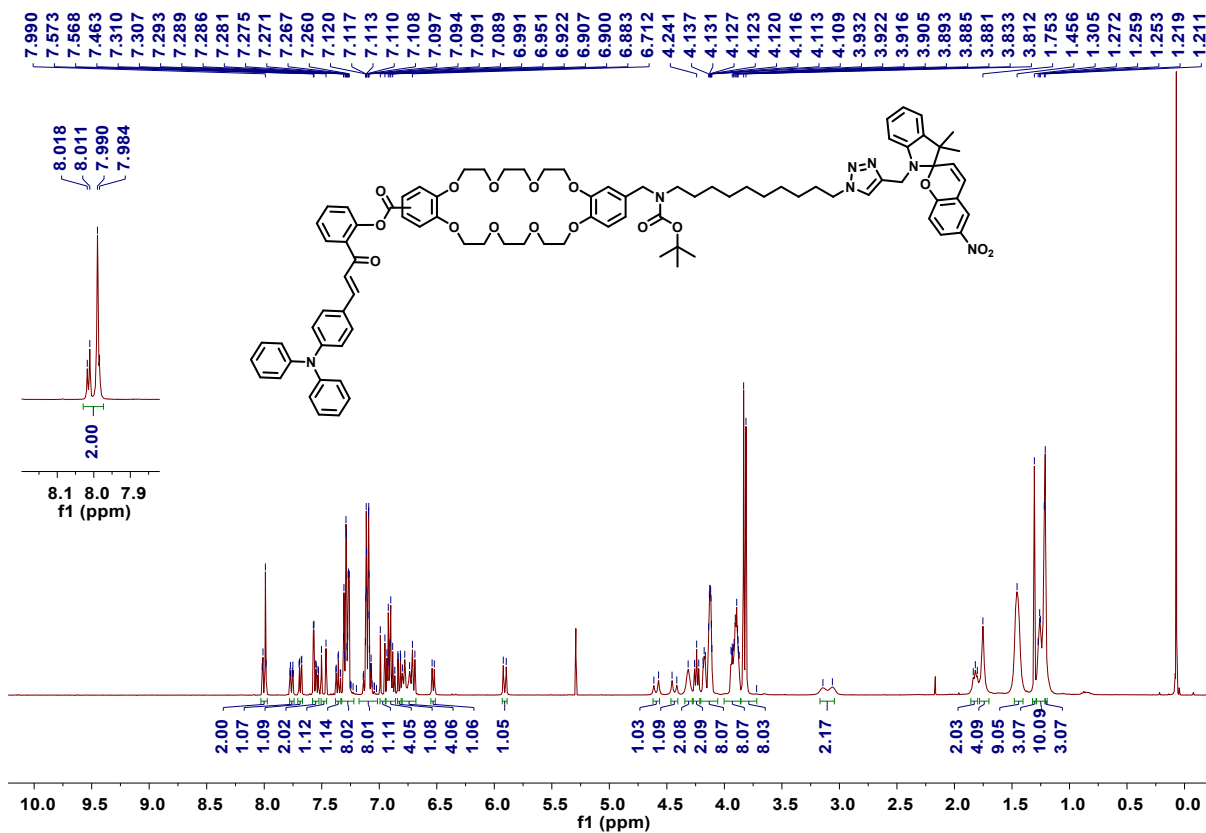

Fig. S18 <sup>1</sup>H NMR spectrum (400 MHz, CDCl<sub>3</sub>) of compound 14.

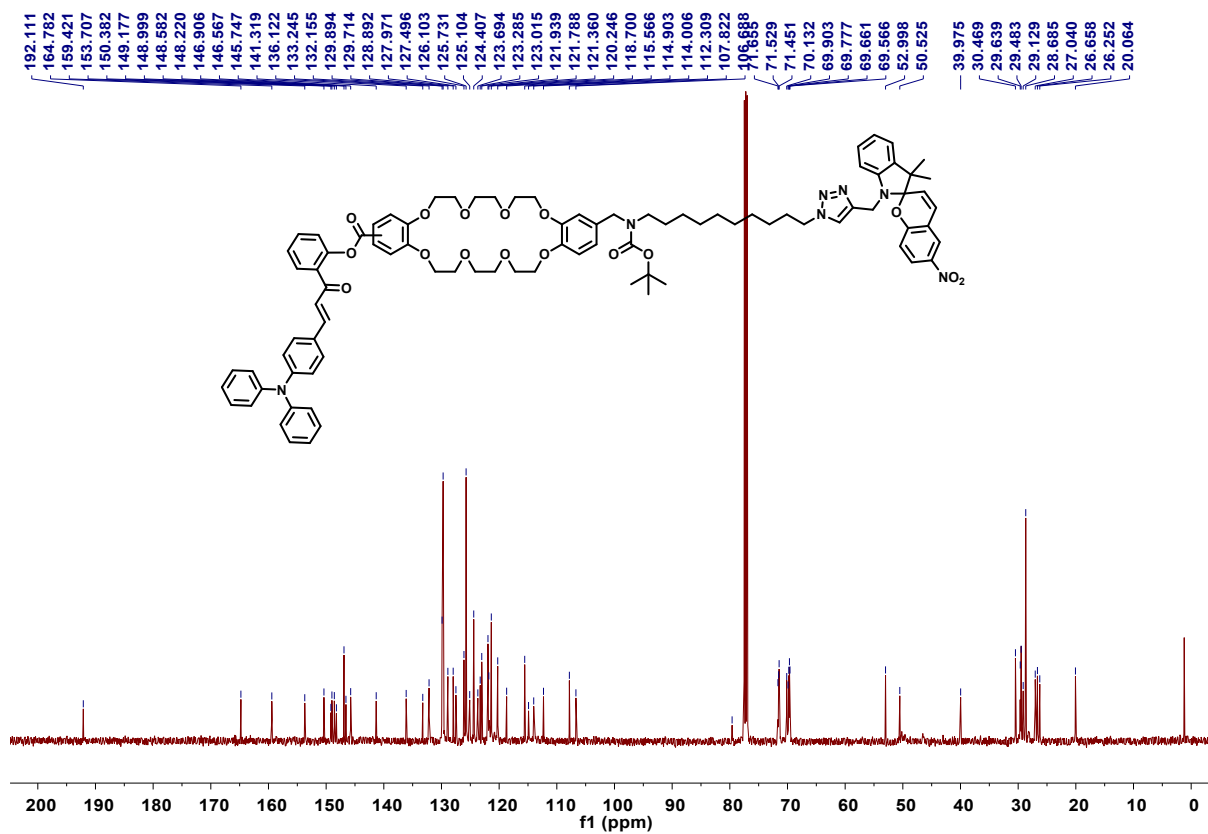

Fig. S19 <sup>13</sup>C NMR spectrum (125 MHz, CDCl<sub>3</sub>) of compound 14.

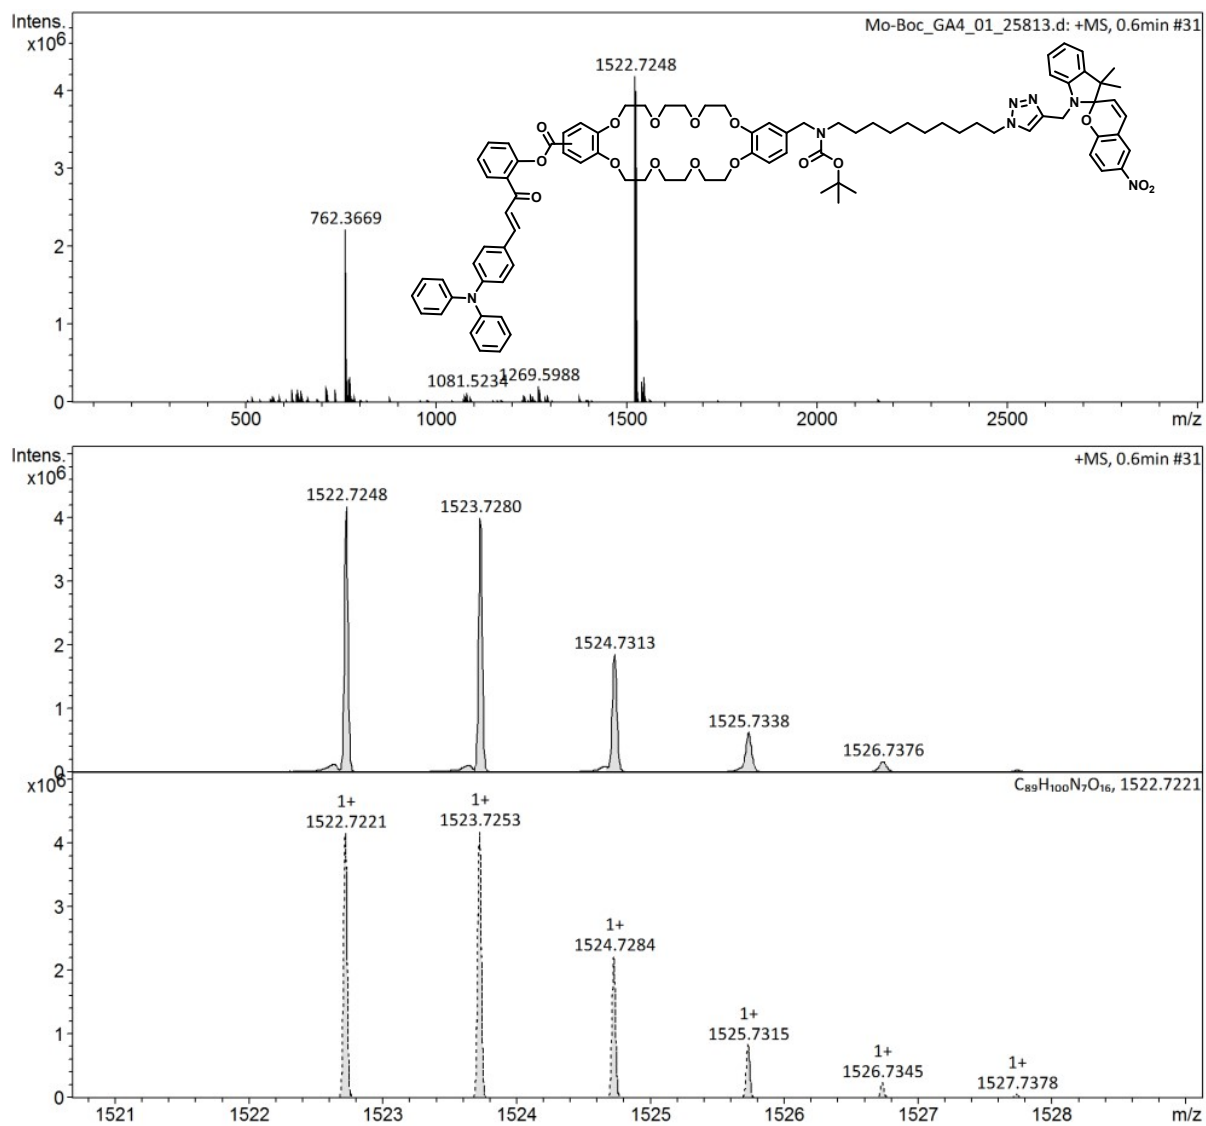

**Fig. S20** HRMS-ESI spectra of compound 14.

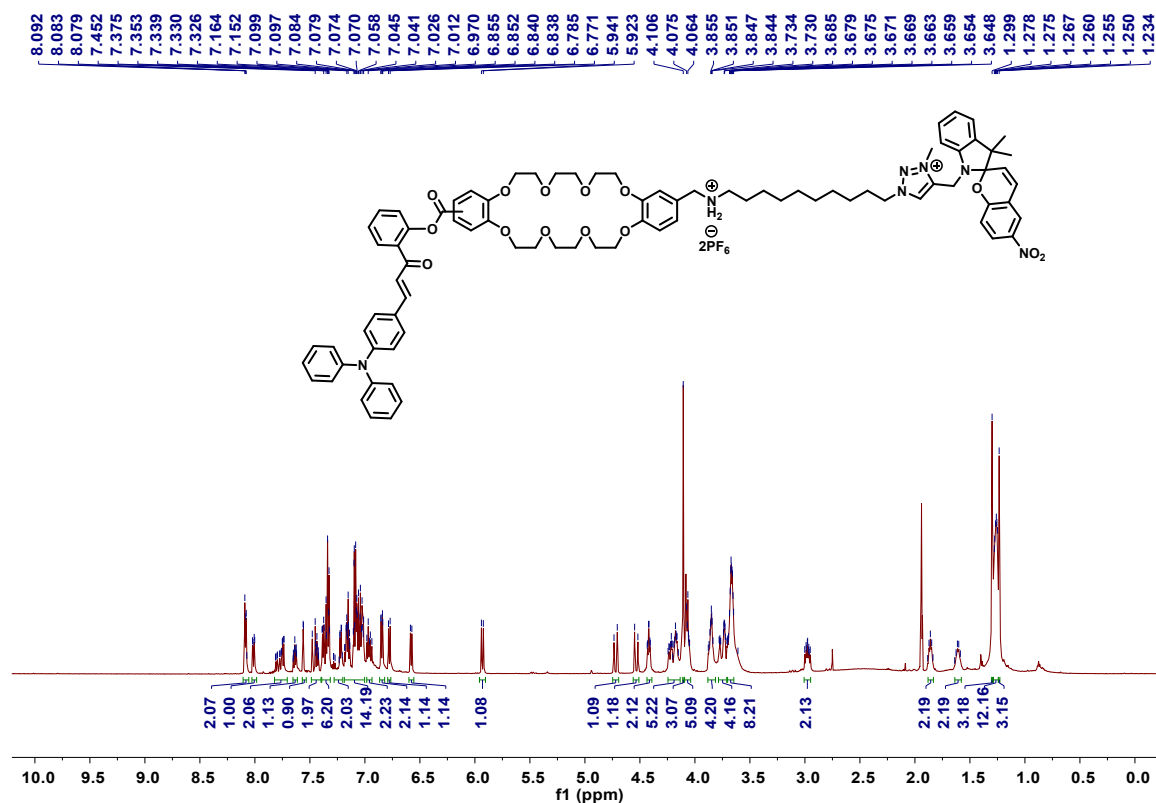

Fig. S21 <sup>1</sup>H NMR spectrum (600 MHz, CD<sub>3</sub>CN) of Cy-SP.

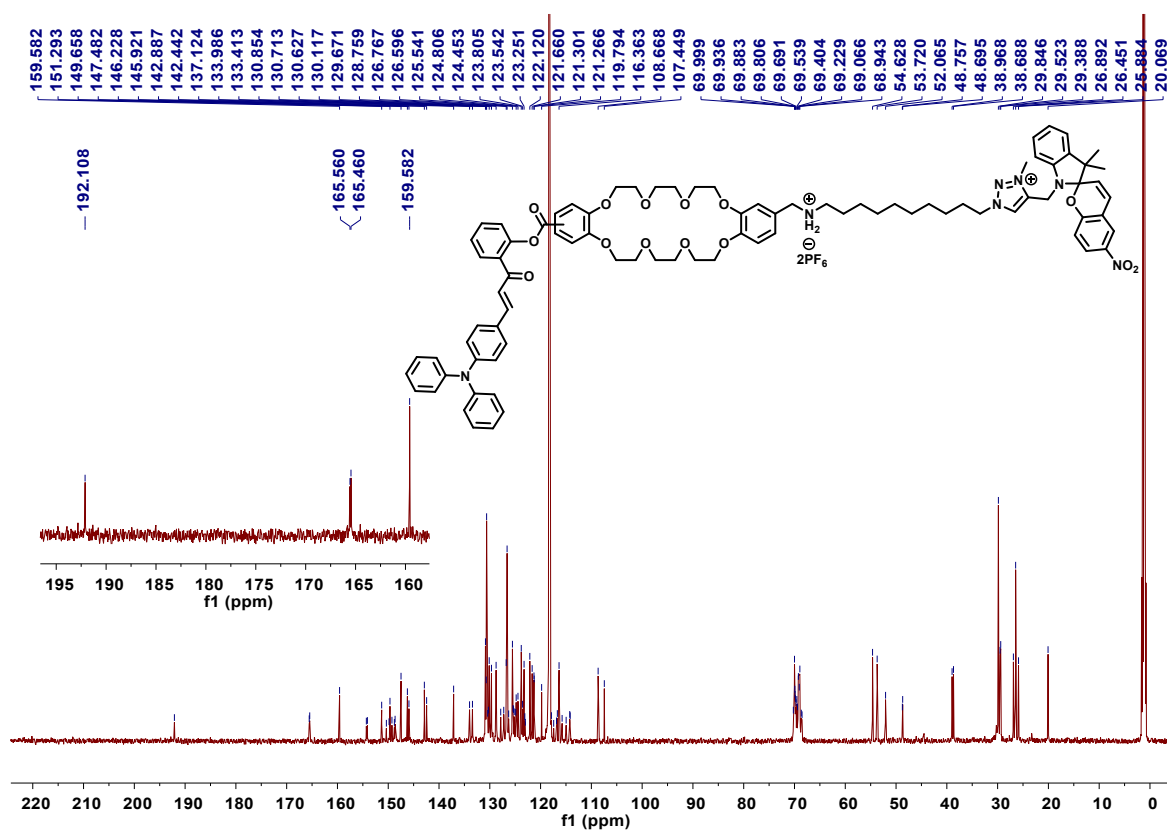

Fig. S22 <sup>13</sup>C NMR spectrum (150 MHz, CD<sub>3</sub>CN) of Cy-SP.

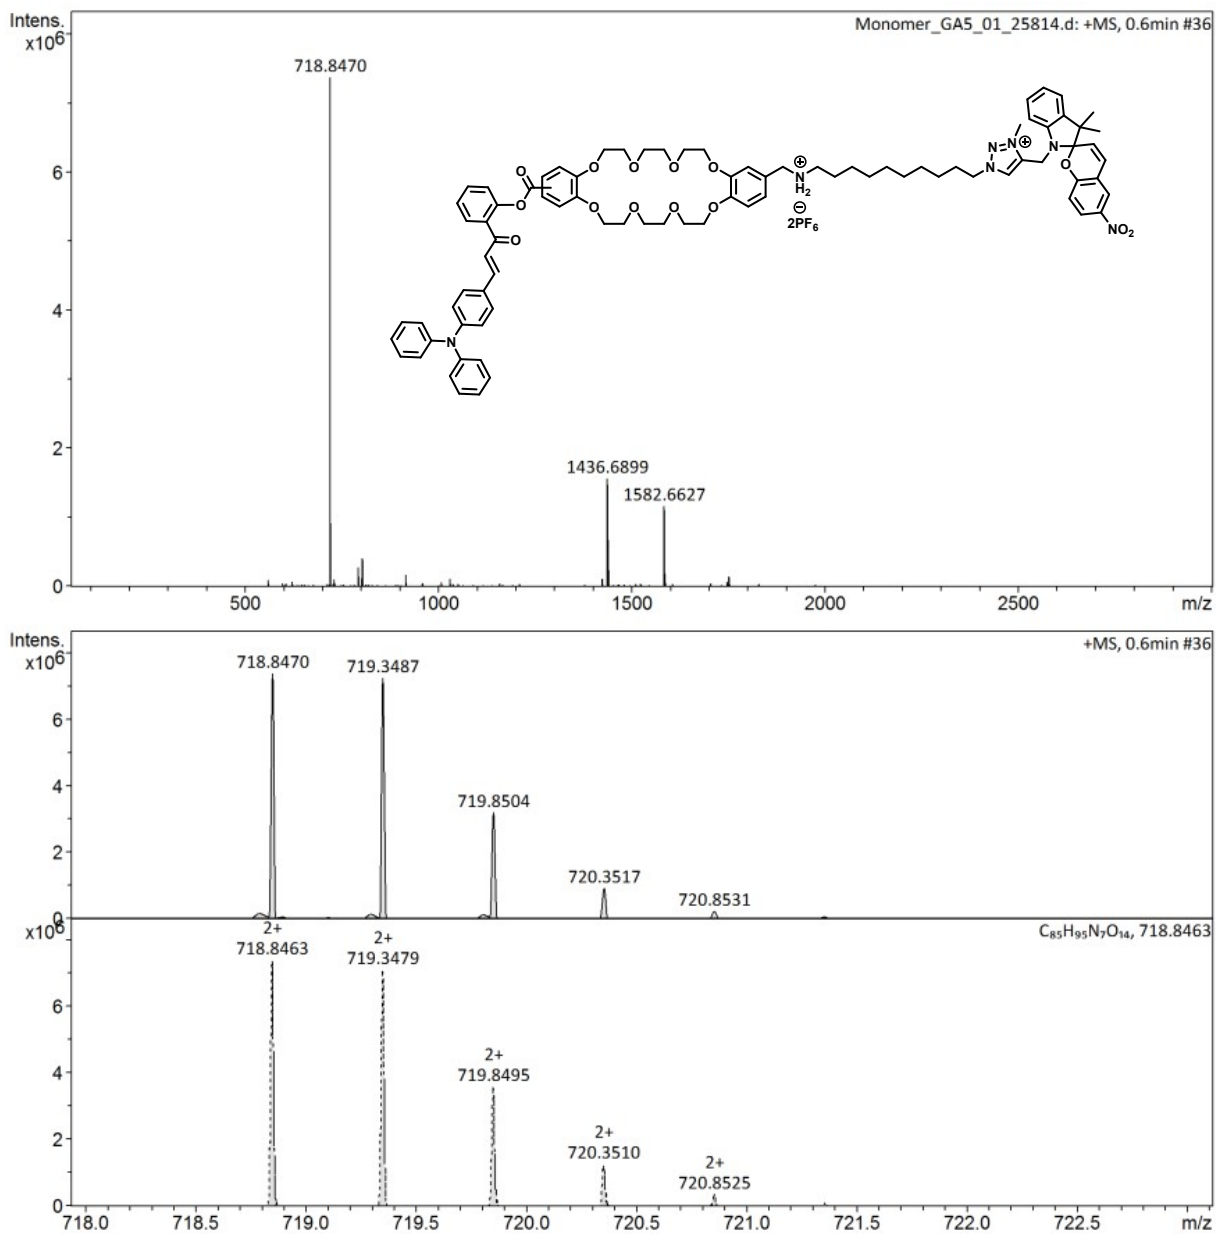

**Fig. S23** HRMS-ESI spectra of Cy-SP.

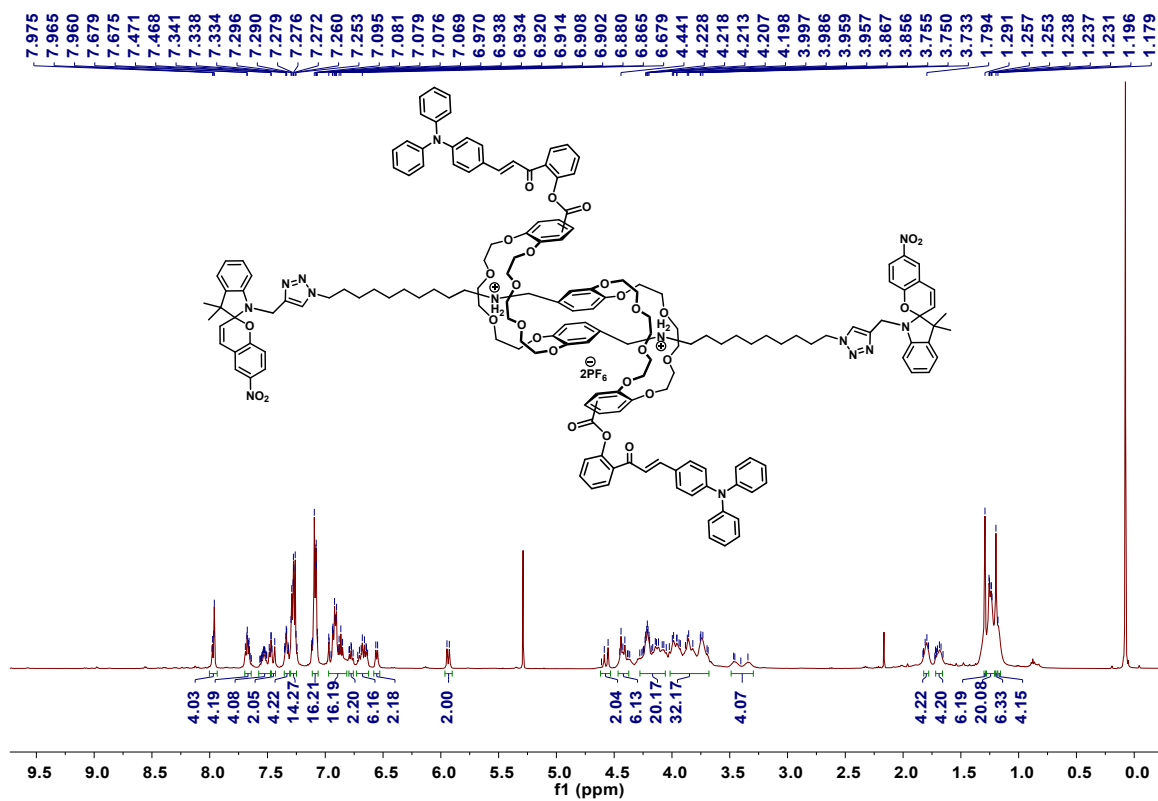

Fig. S24  $^1\text{H}$  NMR spectrum (500 MHz,  $\text{CDCl}_3$ ) of [c2]-SP.

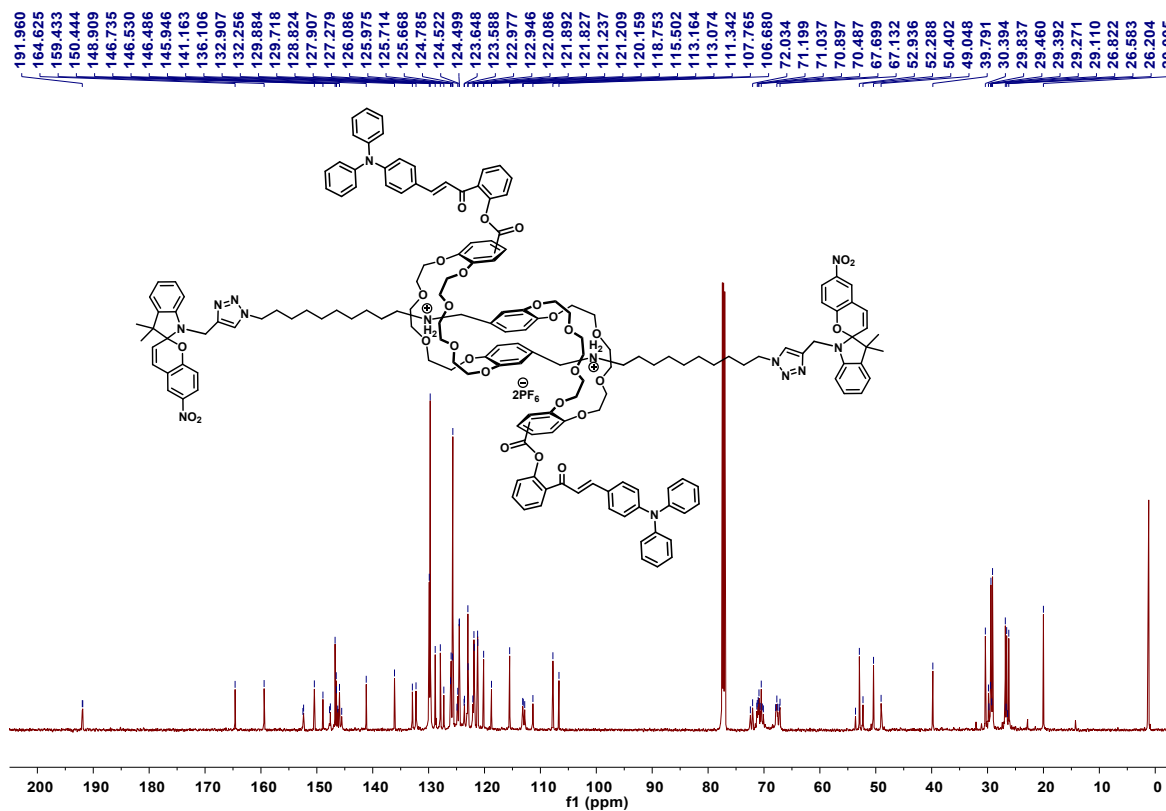

Fig. S25  $^{13}\text{C}$  NMR spectrum (150 MHz,  $\text{CDCl}_3$ ) of [c2]-SP.

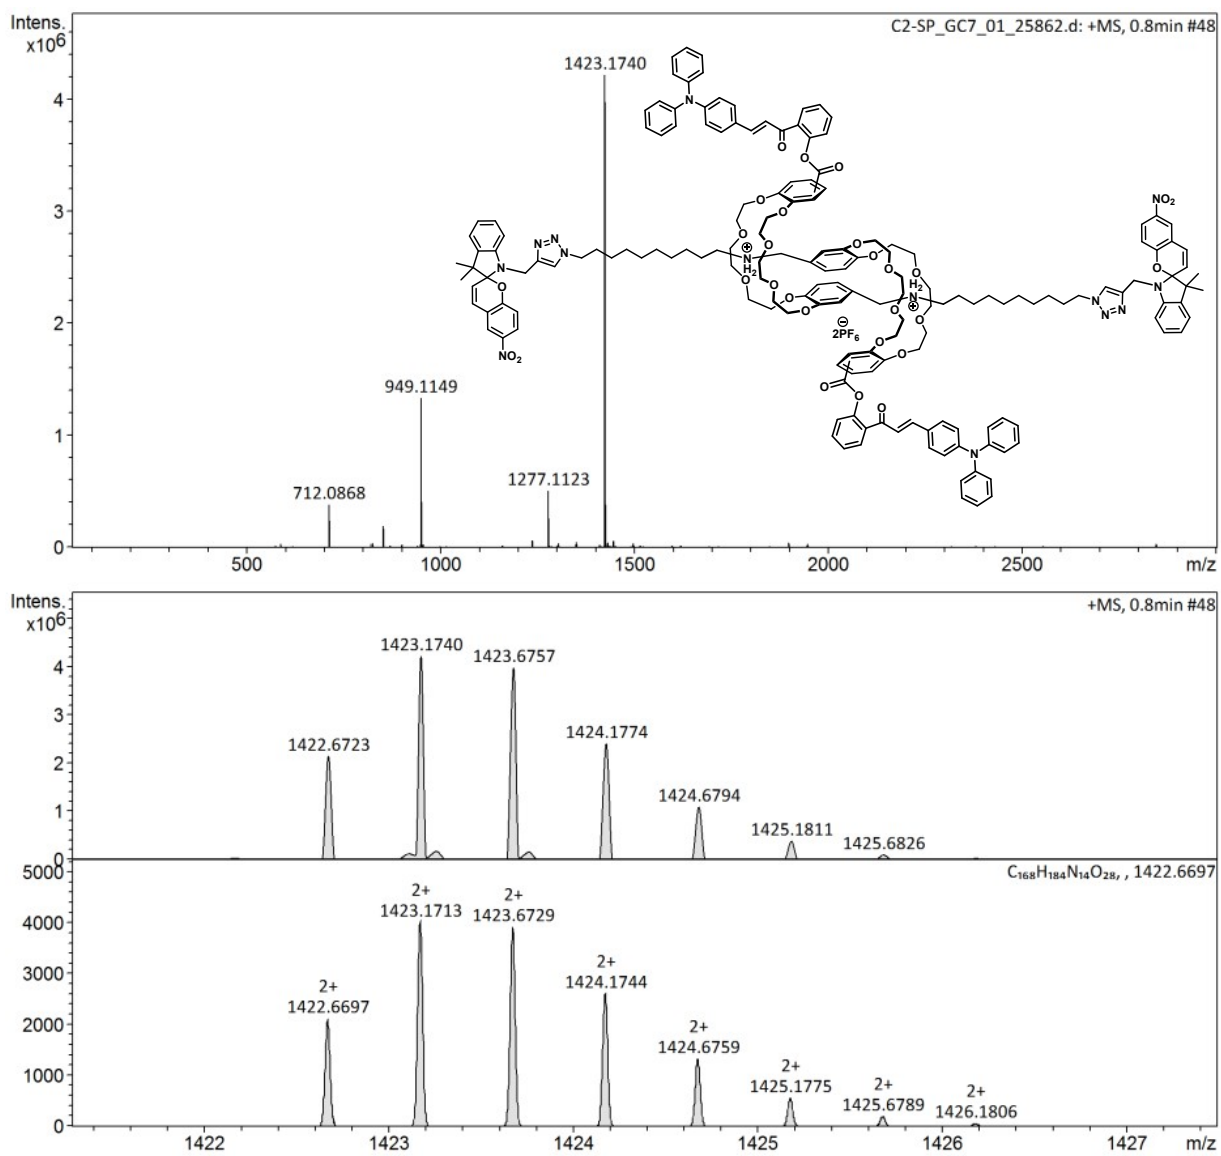

**Fig. S26** HRMS-ESI spectra of [c2]-SP.



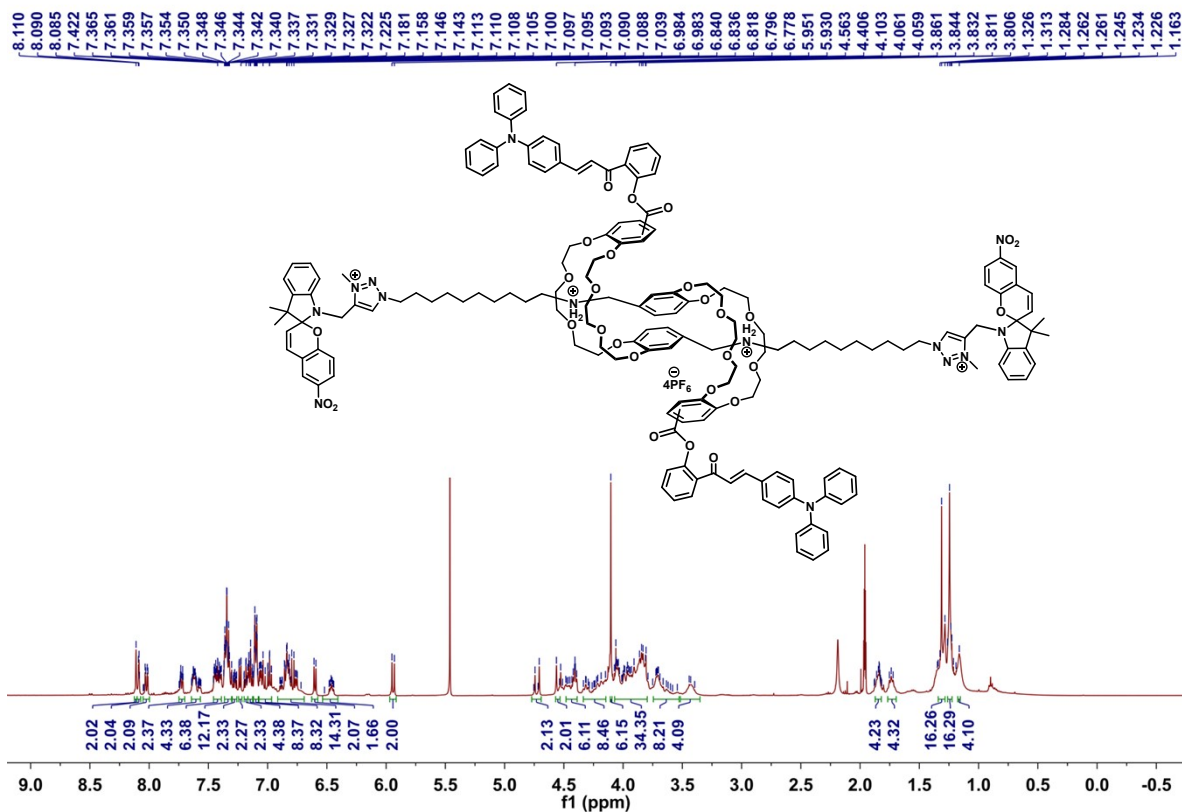

Fig. S27  $^1\text{H}$  NMR spectrum (500 MHz,  $\text{CD}_3\text{CN}$ ) of [c2]-SP-Ext.

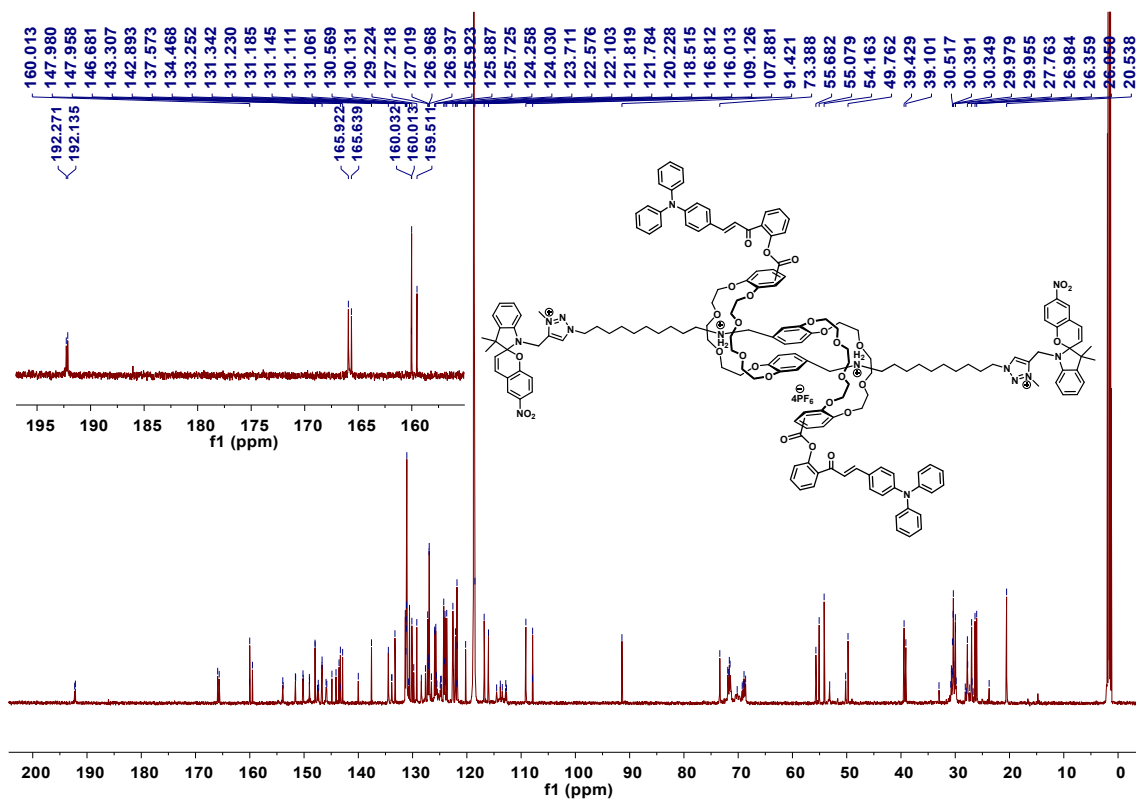

Fig. S28  $^{13}\text{C}$  NMR spectra (150 MHz,  $\text{CD}_3\text{CN}$ ) of [c2]-SP-Ext.

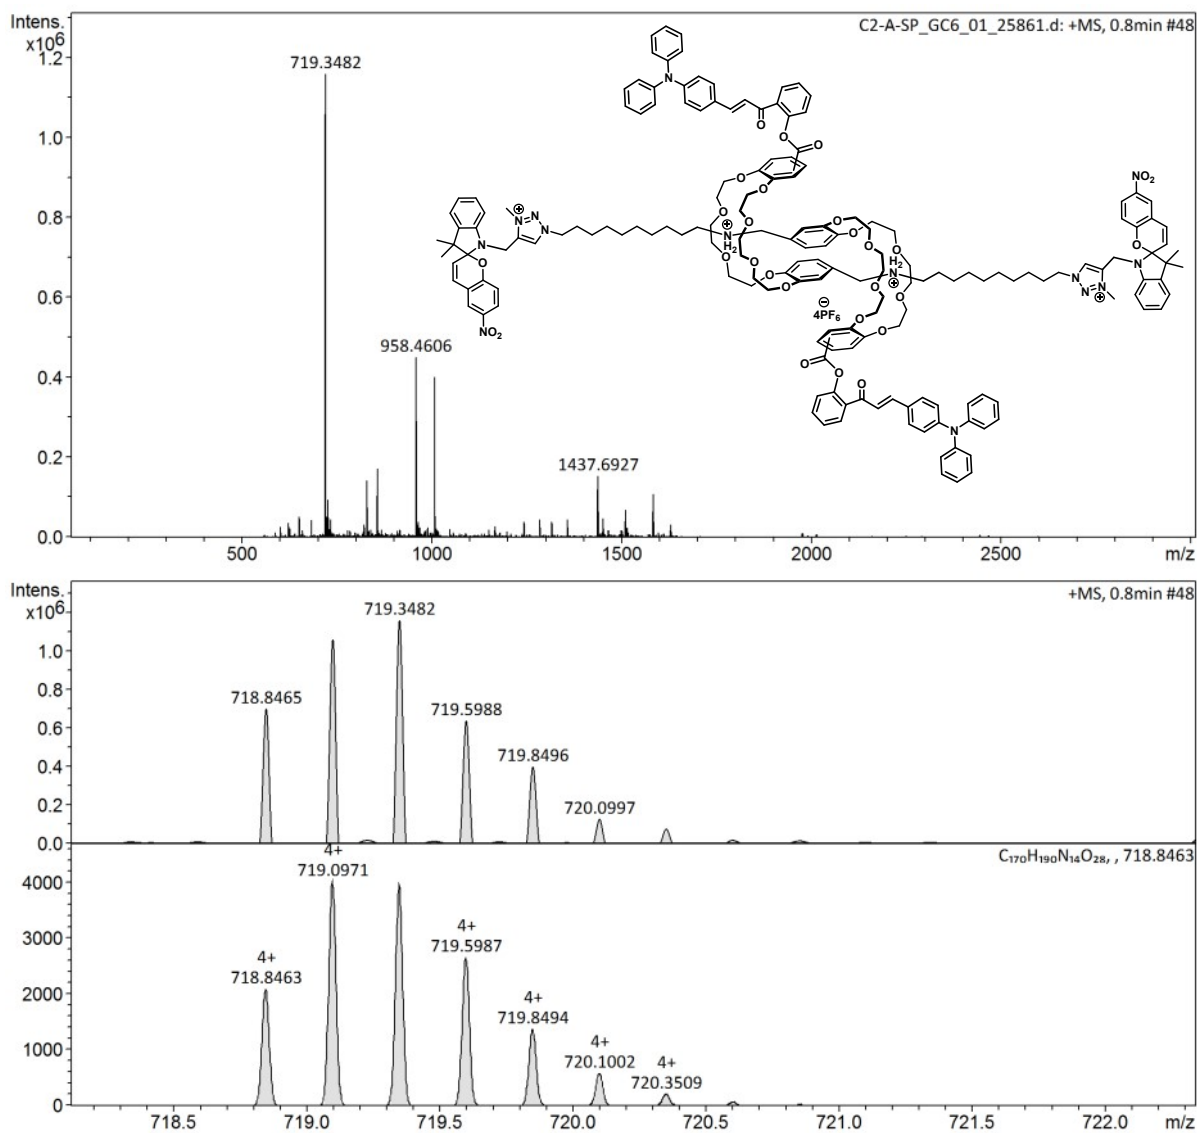

**Fig. S29** HRMS-ESI spectra of [c2]-SP-Ext.

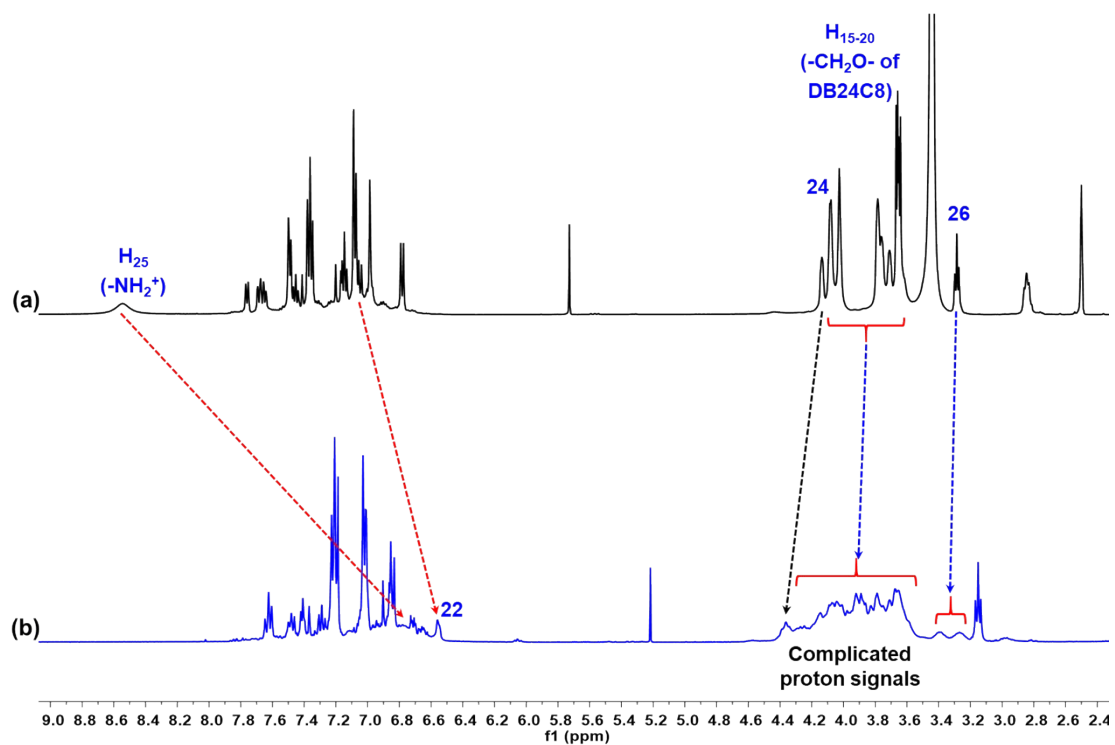

**Fig. S30** Partial  $^1\text{H}$  NMR spectra (400 MHz, 298 K) of compound  $\text{Cy}^+$  in (a)  $\text{DMSO-}d_6$  ( $\text{Cy}^+$  monomer) and (b)  $\text{CDCl}_3$  ( $\text{Cy}^+$  dimer, *pseudo*-[c2]).

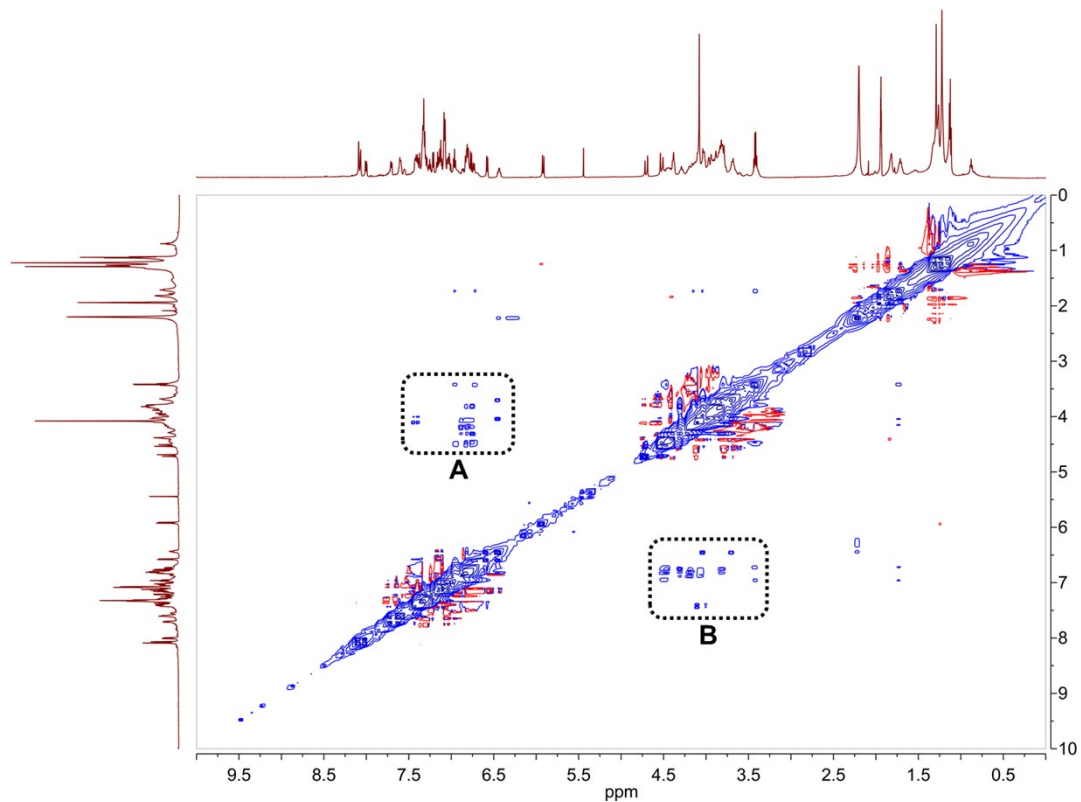

**Fig. S31** 2D NOESY NMR spectrum (600 MHz,  $\text{CD}_3\text{CN}$ ) of [c2]-SP-Ext.

### 3. Photo-physical studies of compounds

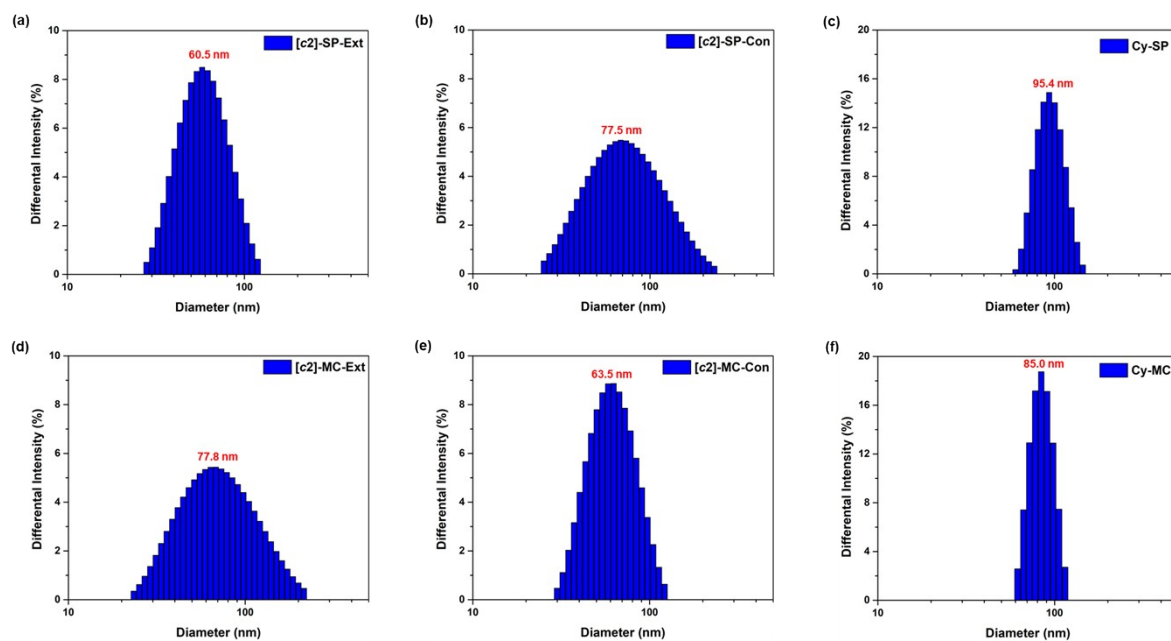

**Fig. S32** DLS results of (a,d) [c2]-SP-Ext and [c2]-MC-Ext, (b,e) [c2]-SP-Con and [c2]-MC-Con and (c,f) Cy-SP and Cy-MC in THF/H<sub>2</sub>O solutions (90% H<sub>2</sub>O). Concentrations: [c2] daisy chains = 20  $\mu$ M, Cy-SP = 40  $\mu$ M.

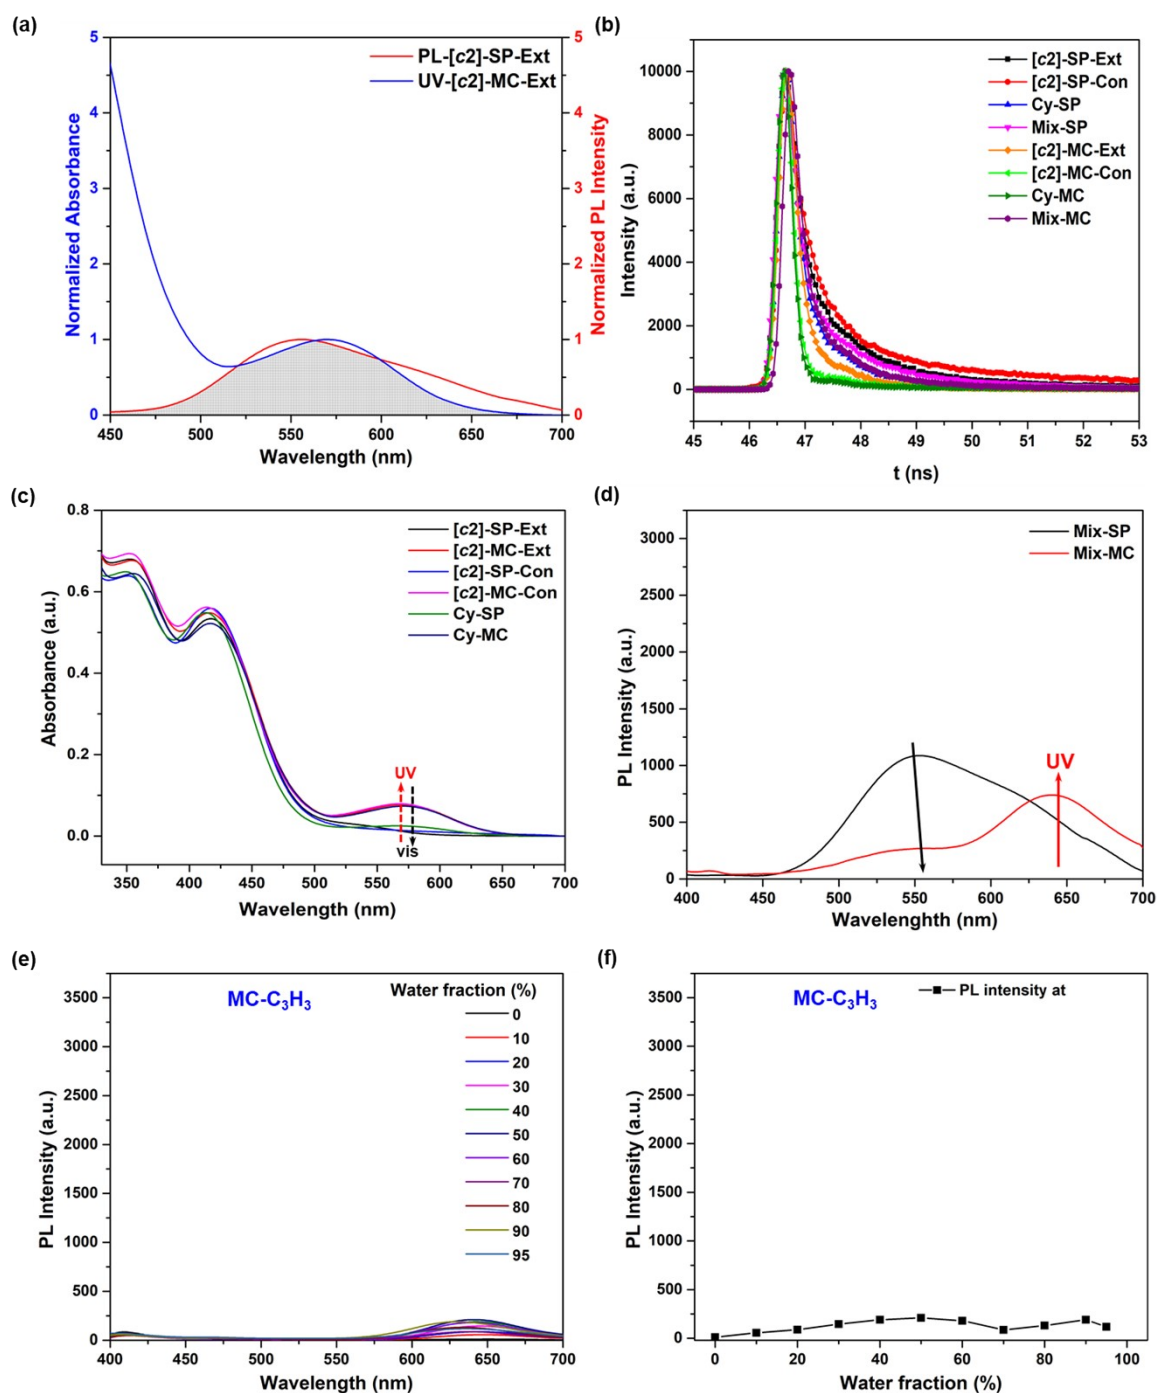

**Fig. S33** (a) Spectral overlap of [c2]-SP-Ext emission ( $\lambda_{\text{ex}} = 365$  nm) and [c2]-MC-Ext absorbance in THF/H<sub>2</sub>O solutions (90% H<sub>2</sub>O, v/v), (b) TRPL spectra of [c2] daisy chain rotaxanes, non-interlocked analogues and mixtures ( $\lambda_{\text{ex}} = 375$  nm,  $\lambda_{\text{em}} = 556$  nm), (c) absorption spectra of [c2] daisy chain rotaxanes and non-interlocked analogues, (d) PL spectra of mixtures under UV/Vis lights, (e) PL spectra and (f) relative PL intensities of MC-C<sub>3</sub>H<sub>3</sub> in THF/H<sub>2</sub>O with different water fractions. Concentrations: [c2] daisy chains = 20  $\mu$ M, Cy-SP = MC-C<sub>3</sub>H<sub>3</sub> = 40  $\mu$ M,  $\lambda_{\text{ex}} = 365$  nm.

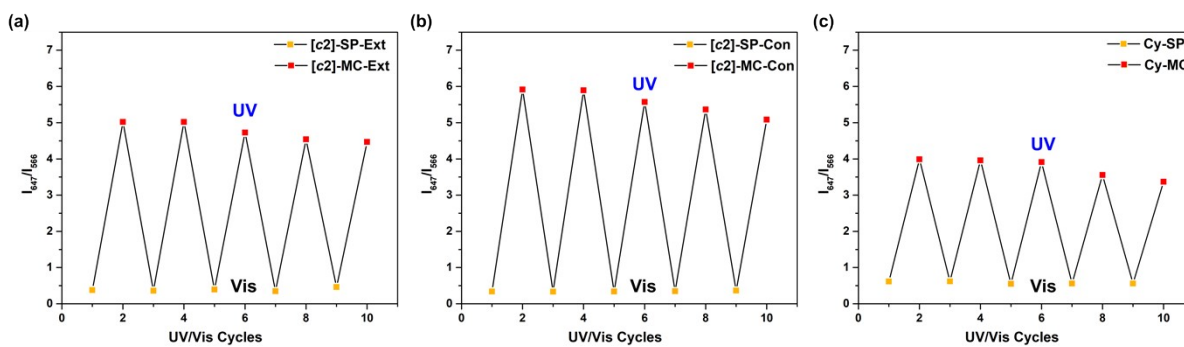

**Fig. S34** Reversible fluorescence switching of (a)  $[c2]\text{-SP-Ext} \leftrightarrow [c2]\text{-MC-Ext}$ , (b)  $[c2]\text{-SP-Con} \leftrightarrow [c2]\text{-MC-Con}$  and (c)  $\text{Cy-SP} \leftrightarrow \text{Cy-MC}$  under alternative UV/Vis exposures.

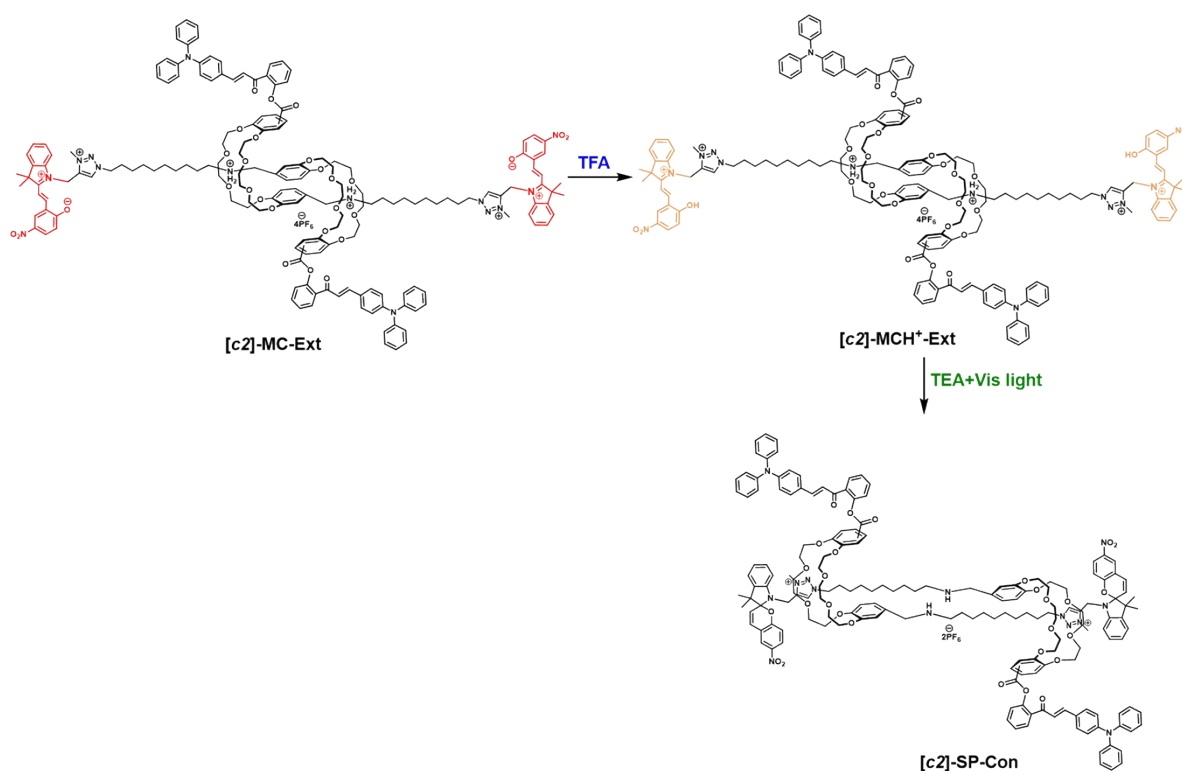

**Fig. S35** Acid-base responses of  $[c2]\text{-MC-Ext}$  upon TFA/TEA treatments.

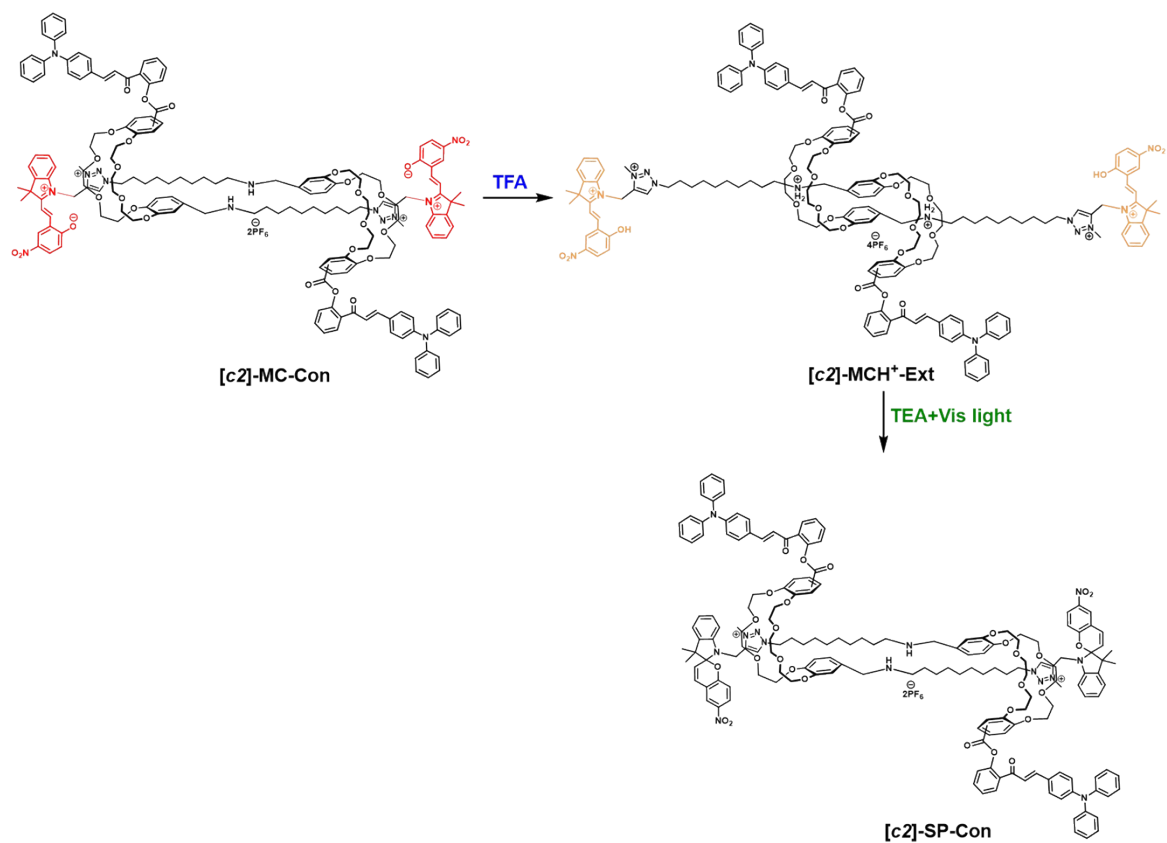

**Fig. S36** Acid-base responses of [c2]-MC-Con upon TFA/TEA treatments.

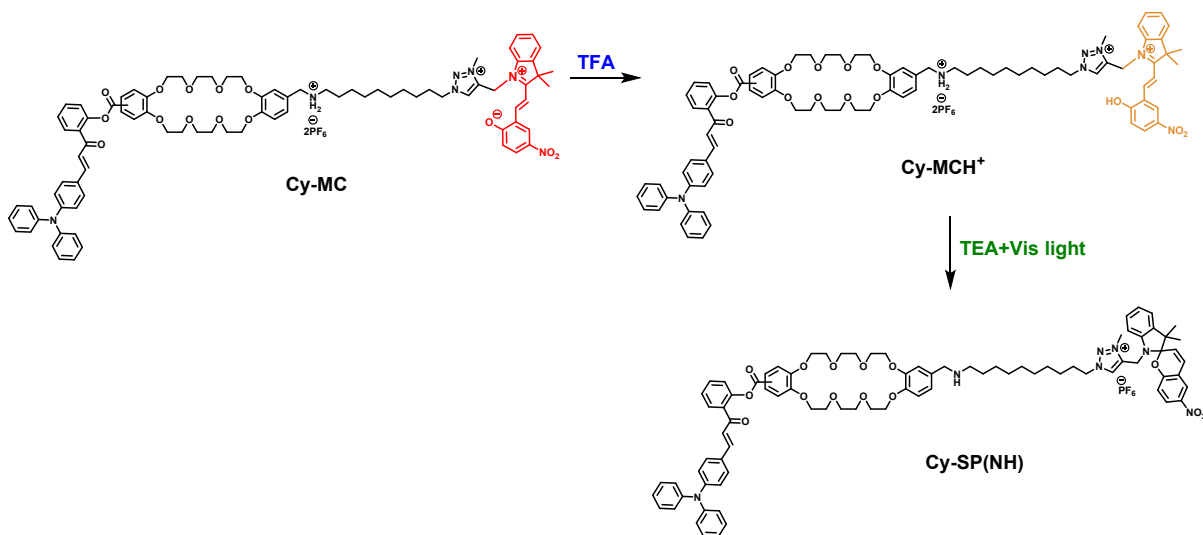

**Fig. S37** Acid-base responses of Cy-MC upon TFA/TEA treatments.

#### 4. References

- (S1) Y.-L. Wang, C. Li, H.-Q. Qu, C. Fan, P.-J. Zhao, R. Tian and M.-Q. Zhu, *J. Am. Chem. Soc.*, 2020, **142**, 7497-7505.
- (S2) Z. Luo, B. Liu, T. Qin, K. Zhu, C. Zhao, C. Pan and L. Wang, *Sens. Actuators B Chem.*, 2018, **263**, 229-236.
- (S3) M. Wang, X. Du, H. Tian, Q. Jia, R. Deng, Y. Cui, C. Wang and K. Meguellati, *Chin. Chem. Lett.*, 2019, **30**, 345-348.
- (S4) X. Chen, Y. Wang, H. Wang, Y. Kim and M. Lee, *Chem. Commun.*, 2017, **53**, 10958-10961.
- (S5) P. Q. Nhien, T. T. K. Cuc, T. M. Khang, C.-H. Wu, B. T. B. Hue, J. I. Wu, B. W. Mansel, H.-L. Chen and H.-C. Lin, *ACS Appl. Mater. Interfaces*, 2020, **12**, 47921-47938.
- (S6) T. T. K. Cuc, P. Q. Nhien, T. M. Khang, C.-C. Weng, C.-H. Wu, B.-t. B. Hue, Y.-K. Li, J. I. Wu and H.-C. Lin, *Chem. Mater.*, 2020, **32**, 9371-9389.
